# Supplementary material for: System Approach for Characterizing and Evaluating Factors for Occupational Health Impacts Due to Nonfatal Injuries and Illnesses for the Use in Life Cycle Assessment
Source: PubMed Central journal article supplement — Environ Sci Technol. 2023 Jul 25;57(32):11738–49. doi: 10.1021/acs.est.3c00188 (PMC10433530; doi:10.1021/acs.est.3c00188), 2023-07-25
Supplement: es3c00188_si_001.pdf [file es3c00188_si_001.pdf]

## Supplementary Information

### System approach for characterizing and evaluating factors for occupational health impacts due to nonfatal injuries and illnesses for the use in life cycle assessment

Zhehan Huang,<sup>1</sup> Gaël Kijko,<sup>2</sup> Kelly Scanlon,<sup>3</sup> Shannon Lloyd,<sup>4</sup> Andrew Henderson,<sup>5,6</sup> Peter Fantke,<sup>7</sup> Olivier Jolliet,<sup>7,8</sup> Shaobin Li<sup>1,\*</sup>

<sup>1</sup> College of the Environment and Ecology, Xiamen University, Xiamen, Fujian, 361102, China

<sup>2</sup> École Polytechnique de Montréal, Montreal, Quebec, H3C 3A7, Canada

<sup>3</sup> Independent Researcher, Washington, DC, 20008, USA

<sup>4</sup> John Molson School of Business, Concordia University, Montréal, QC, H3G 2J1, Canada

<sup>5</sup> School of Public Health, University of Texas Health Science Center, Austin, TX, 77030, USA

<sup>6</sup> Eastern Research Group, Concord, MA, 01742, USA

<sup>7</sup> Quantitative Sustainability Assessment, Department of Environmental and Resource Engineering, Technical University of Denmark, Kgs. Lyngby, 2800, Denmark

<sup>8</sup> Department of Environmental Health Sciences, School of Public Health, University of Michigan, MI 48109, USA

\* Corresponding author at College of Environment and Ecology, Xiamen University, Xiamen, 361102, China

\* Corresponding author email: [shaobinli@xmu.edu.cn](mailto:shaobinli@xmu.edu.cn)

## Contents

|                                                                                                               |           |
|---------------------------------------------------------------------------------------------------------------|-----------|
| <b>Section S1: Workflow of the study .....</b>                                                                | <b>3</b>  |
| <b>Section S2: Additional notes on methods .....</b>                                                          | <b>4</b>  |
| Section S2.1: Further explanations on data source .....                                                       | 4         |
| Section S2.2: Allocation.....                                                                                 | 4         |
| Section S2.3: Nomenclature used in this study .....                                                           | 8         |
| Section S2.4: Conversion from NAICE code to EIO code .....                                                    | 9         |
| Section S2.5: Structural Path Analysis (SPA).....                                                             | 9         |
| <b>Section S3: Additional notes on results .....</b>                                                          | <b>11</b> |
| Section S3.1: Direct impacts of occupational health .....                                                     | 11        |
| Section S3.2: Total impacts of occupational health (shown in a tree map) .....                                | 12        |
| Section S3.3: Result variation between years .....                                                            | 13        |
| Section S3.4: Structural path analysis of the U.S. economy .....                                              | 16        |
| Section S3.5: Structural path analysis of the office chair .....                                              | 16        |
| <b>Section S4: Uncertainty and sensitivity analysis .....</b>                                                 | <b>18</b> |
| Section S4.1: Uncertainty sources.....                                                                        | 18        |
| Section S4.2: Results of the uncertainty analysis.....                                                        | 19        |
| Section S4.3: Sensitivity analysis .....                                                                      | 19        |
| <b>Section S5: New dataset developed in this study .....</b>                                                  | <b>22</b> |
| Section S5.1: Dataset of direct impact factors of occupational health impacts ...                             | 22        |
| Section S5.2: Dataset of total characterization factors ( $CF_{total}$ ) for occupational health impacts..... | 36        |
| Section S5.3: Applicability of our approach to other countries .....                                          | 50        |
| <b>References .....</b>                                                                                       | <b>52</b> |

## Section S1: Workflow of the study

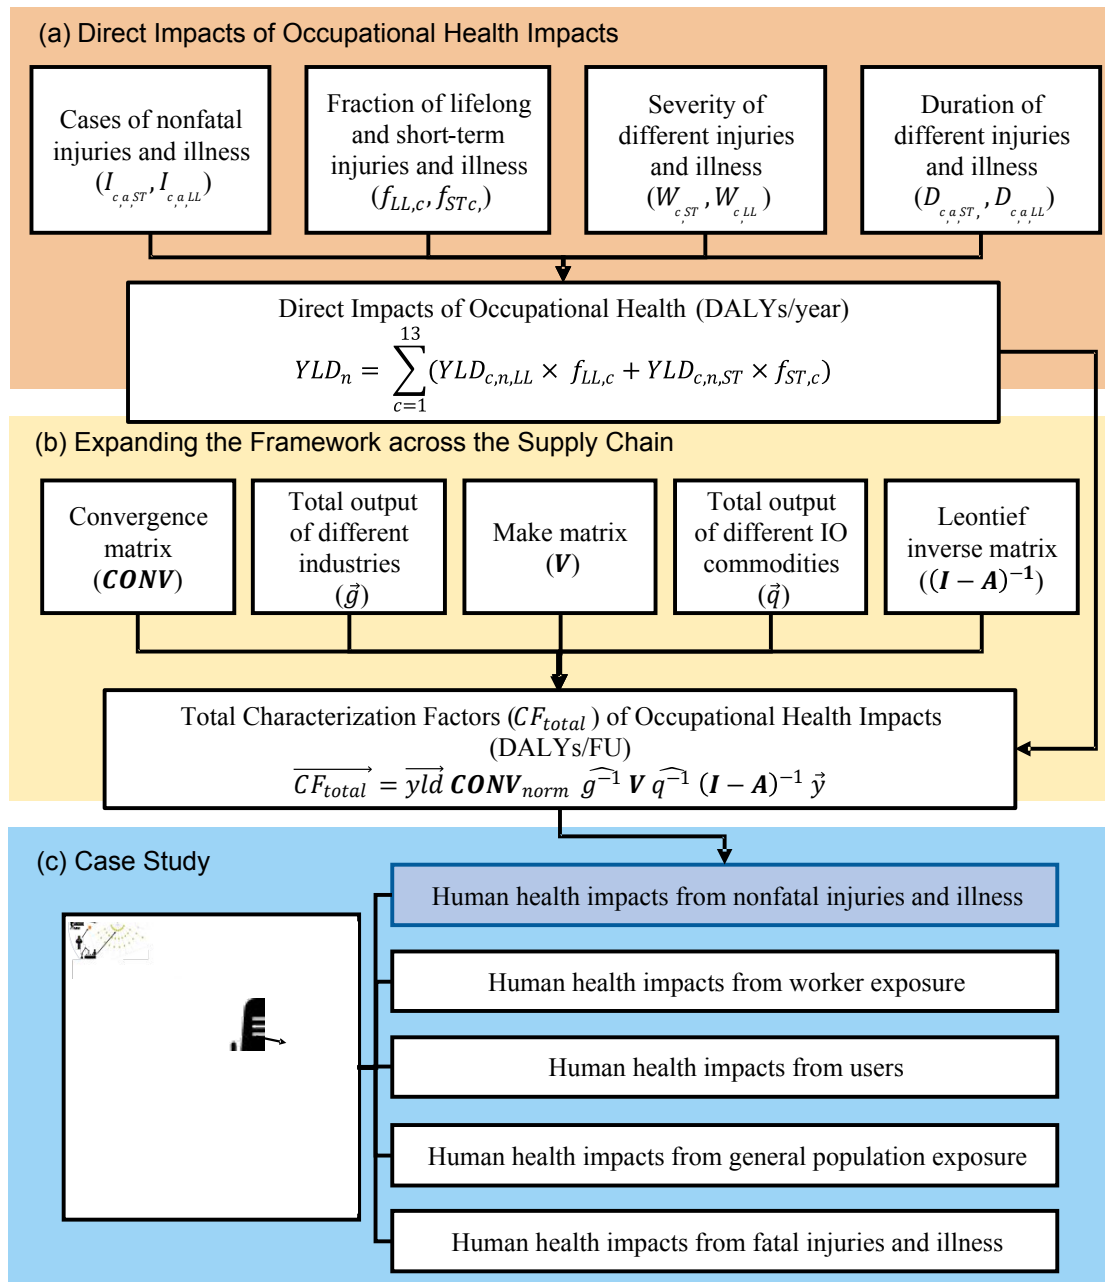

**Figure S1.** The workflow of the study. DALYs represents disability-adjusted life years. (a) the calculation of direct impacts of work environment human health through their produce process; (b) the calculation of total characterization factors of occupational health impacts across the entire supply chain; (c) a case study of an office chair to compare occupational health impacts with other human health impacts

## **Section S2: Additional notes on methods**

### **Section S2.1: Further explanations on data source**

Injury statistics by industry as represented by NACIS codes from 2014 to 2018 provided by the U.S. Bureau of Labor Statistics were used in this study, which covers 13 workplace injuries and all 1067 NACIS codes representing Class 6 industries<sup>1</sup>; these data provide the specific number of different workplace injuries per year in these industries as well as the duration of different workplace injuries. In turn, the Global Burden of Disease provides data needed for this study including, but not limited to, the proportion of different diseases that produce lifetime (or short-term) effects, the duration of different diseases, and the severity of different diseases.<sup>2-7</sup> The US Environmentally-Extended Input-Output Models (USEEIO v2.0)<sup>8</sup>, calculated by the US Bureau of Economic Analysis based on 2012 data, are the primary economic data for this study (including total production, total output in US dollars for the corresponding commodities in each industry, production matrices that allow the conversion of IO industries into IO commodities, and direct production matrices. The USEEIO is the source of the main economic data for this study (including total production, total output of each industry in dollar terms, production matrix that converts IO industries into IO commodities, and direct input coefficient matrix) (Table S1-4).

### **Section S2.2: Allocation**

Due to an inherent flaw in the data used, not all 6-digit industries have corresponding injury data, but all 6-digit industries are needed in the convergence matrix, so the data need to be filled in. Since only 2-digit industries in the 6-digit classification system cover all 6-digit industries, it was decided to use the injury and illness data from 2-digit industries to assign the 6-digit industries with missing data covered by them. The number of injuries and illnesses for all 6-digit industries was estimated by first deducting the existing 6-digit industry data from the injury and illness data for 2-digit industries, and then equally distributing the remaining number of injuries and illnesses to all corresponding 6-digit industries (including 6-digit industries with data).

**Table S1. Variable names, symbols and their sources**

| <b>Variable Name</b>         | <b>Description</b>                                                                                                                           | <b>Symbol</b>                    | <b>Source</b>                                                                                                                              |
|------------------------------|----------------------------------------------------------------------------------------------------------------------------------------------|----------------------------------|--------------------------------------------------------------------------------------------------------------------------------------------|
| Severity                     | the severity of short-term (ST) or lifelong (LL) injuries and illness indicated by each of the natural codes (c)                             | $W_{c,ST}$ $W_{c,LL}$            | Report from James et al. <sup>9</sup><br>Global Burden of Disease report 2013 <sup>6</sup> & 2017                                          |
| Cases                        | different occupational injuries and illnesses (c) in each age group (a) for short-term (ST) or lifetime (LL) nonfatal injuries and illnesses | $I_{c,a,ST}$ $I_{c,a,LL}$        | U.S. Bureau of Labor Statistics (2014-2018) <sup>1</sup>                                                                                   |
| Short-term duration          | duration of each short-term (ST) injury or illness (c) in each age group (a)                                                                 | $D_{c,a,ST}$                     | Global Burden of Disease report 1996 <sup>4</sup> & 2013 <sup>6</sup>                                                                      |
| Lifelong duration            | duration of lifelong (LL) injuries and illnesses (c) in each age group (a)                                                                   | $D_{c,a,LL}$                     |                                                                                                                                            |
| Short-long split coefficient | Split injuries into lifelong and short-term                                                                                                  | $f_{LL}$<br>$f_{ST}$             |                                                                                                                                            |
| Conversion matrix            | turn NAICS code into EIO code                                                                                                                | <b><i>CONV</i></b>               |                                                                                                                                            |
| Total output of industries   | inverse diagonal matrix of the total output of the different industries                                                                      | $\vec{g}$                        |                                                                                                                                            |
| Make matrix                  | IO industries as rows and IO goods as columns                                                                                                | <b><i>V</i></b>                  |                                                                                                                                            |
| Total output of commodities  | inverse diagonal matrix based on the total output of commodities in different industries                                                     | $\vec{q}$                        | US Environmentally-Extended Input-Output Models (USEEIO v2.0) <sup>8</sup> (developed based on data from U.S. Bureau of Economic Analysis) |
| Leontief inverse matrix      | represent the total production of different industries required to produce one dollar of that type of good                                   | $(\mathbf{I} - \mathbf{A})^{-1}$ |                                                                                                                                            |
| Final demand vector          | represent each good in the manufacturing stage in \$ per good                                                                                | $\vec{y}$                        |                                                                                                                                            |

**Table S2. Specific sources of severity weight and short-term duration**

| Type of injuries or illnesses             | Life-long severity weight ( $W_{c,LL}$ ), average age                                                          | Short-term severity weight, ( $W_{c,ST}$ ), average age                                                          | Short-term duration, ( $D_{c,a,ST}$ ), average age                                                               |
|-------------------------------------------|----------------------------------------------------------------------------------------------------------------|------------------------------------------------------------------------------------------------------------------|------------------------------------------------------------------------------------------------------------------|
| Sprains, strains, tears                   | -                                                                                                              | James et al. 2020                                                                                                | BLS 2015                                                                                                         |
| Fractures                                 | GBD, 2013                                                                                                      | James et al. 2020                                                                                                | GBD 1996                                                                                                         |
| Cuts, lacerations                         | -                                                                                                              | James et al. 2020                                                                                                | GBD 1996                                                                                                         |
| Puncture wounds, except gunshot wounds    | -                                                                                                              | James et al. 2020                                                                                                | GBD 1996                                                                                                         |
| Bruises, contusions                       | -                                                                                                              | James et al. 2020                                                                                                | BLS 2015                                                                                                         |
| Heat burns                                | GBD, 2013                                                                                                      | James et al. 2020                                                                                                | GBD 1996                                                                                                         |
| Chemical burns                            | GBD, 2013                                                                                                      | James et al. 2020                                                                                                | GBD 1996                                                                                                         |
| Amputations                               | GBD, 2010                                                                                                      | -                                                                                                                | BLS 2015                                                                                                         |
| Carpal tunnel syndrome                    | GBD, 2013                                                                                                      | James et al. 2020                                                                                                | BLS 2015                                                                                                         |
| Tendonitis                                | GBD, 2013                                                                                                      | -                                                                                                                | BLS 2015                                                                                                         |
| Multiple traumatic injuries and disorders | GBD, 2013                                                                                                      | James et al. 2020                                                                                                | GBD 1996                                                                                                         |
| Soreness, pain                            | -                                                                                                              | Scanlon et al.                                                                                                   | BLS 2015                                                                                                         |
| Unspecified nonfatal injuries             | Weighted average of all other lifelong injuries depending on the number of injuries reported in 2015-2018[BLS] | Weighted average of all other short-term injuries depending on the number of injuries reported in 2015-2018[BLS] | Weighted average of all other short-term injuries depending on the number of injuries reported in 2015-2018[BLS] |

**Table S3. Specific values of severity weight and short-term duration**

| Type of injuries or illnesses             | Life-long severity weight ( $W_{c,LL}$ ), average age | Short-term severity weight, ( $W_{c,ST}$ ), average age | Short-term duration, ( $D_{c,a,ST}$ ), average age |
|-------------------------------------------|-------------------------------------------------------|---------------------------------------------------------|----------------------------------------------------|
| Sprains, strains, tears                   | 0.000                                                 | 0.0075                                                  | 0.038                                              |
| Fractures                                 | 0.066                                                 | 0.1081                                                  | 0.108                                              |
| Cuts, lacerations                         | 0.000                                                 | 0.0058                                                  | 0.024                                              |
| Puncture wounds, except gunshot wounds    | 0.000                                                 | 0.0058                                                  | 0.024                                              |
| Bruises, contusions                       | 0.000                                                 | 0.0075                                                  | 0.016                                              |
| Heat burns                                | 0.076                                                 | 0.2772                                                  | 0.214                                              |
| Chemical burns                            | 0.076                                                 | 0.2772                                                  | 0.214                                              |
| Amputations                               | 0.131                                                 | 0.0000                                                  | 0.104                                              |
| Carpal tunnel syndrome                    | 0.113                                                 | 0.0638                                                  | 0.112                                              |
| Tendonitis                                | 0.187                                                 | 0.0000                                                  | 0.056                                              |
| Multiple traumatic injuries and disorders | 0.252                                                 | 0.1392                                                  | 0.034                                              |
| Soreness, pain                            | 0.000                                                 | 0.061                                                   | 0.028                                              |
| Unspecified nonfatal injuries             | 0.105                                                 | 0.0388                                                  | 0.044                                              |

**Table S4. Specific values and source of the fraction of cases that result in short-term or lifelong health outcomes**

| Types of injury or illnesses  | Baseline |            | Sensitivity analysis |            | Original Source in Scanlon et al. <sup>10</sup>            |
|-------------------------------|----------|------------|----------------------|------------|------------------------------------------------------------|
|                               | Lifelong | Short-term | Lifelong             | Short-term |                                                            |
| Sprains, strains, tears       | 0%       | 100%       | 1%                   | 99%        | 021 Sprains- strains-tears                                 |
| Fractures                     | 2%       | 98%        | 3%                   | 97%        | 012 Fractures                                              |
| Cuts, lacerations             | 0%       | 100%       | 1%                   | 99%        | 034 Cuts- lacerations                                      |
| Puncture wounds               | 0%       | 100%       | 1%                   | 99%        | 037 Punctures- except bites                                |
| Bruises, contusions           | 0%       | 100%       | 1%                   | 99%        | 043 Bruises- contusions                                    |
| Heat burns                    | 50%      | 50%        | 51%                  | 49%        | 053 Heat burns- scalds                                     |
| Chemical burns                | 50%      | 50%        | 51%                  | 49%        | 051 Chemical burns                                         |
| Amputations                   | 100%     | 0%         | 100%                 | 0%         | 031 Amputations                                            |
| Carpal tunnel syndrome        | 50%      | 50%        | 51%                  | 49%        | 124 Disorders of the peripheral nervous system             |
| Tendonitis                    | 100%     | 0%         | 99%                  | 1%         | 173 Rheumatism- except the back                            |
| Multiple traumatic injuries   | 40%      | 60%        | 41%                  | 61%        | 080 Multiple traumatic injuries and disorders- unspecified |
| Soreness, pain                | 20%      | 80%        | 21%                  | 79%        | 097 Nonspecified injuries and disorders (adjusted*)        |
| Unspecified nonfatal injuries | 25%      | 75%        | 26%                  | 74%        | 9999 Nonclassifiable (adjusted**)                          |

Note: Data marked with '(adjusted)' is not the same as the original ones

\* Adjusted because these two categories do not correspond perfectly and are adjusted after expert opinion.

\*\* Adjusted because it is a weighted average of all other diseases by number of cases.

### Section S2.3: Nomenclature used in this study

This section details the different nomenclature used in the study to avoid confusions (Table S5). Corresponding formulae for some specific terms are also provided.

**Table S5. Descriptions of nomenclature used in this study**

| Nomenclature                                    | Description                                                                                                                                                                                                                                                                                                                                                                                                    |
|-------------------------------------------------|----------------------------------------------------------------------------------------------------------------------------------------------------------------------------------------------------------------------------------------------------------------------------------------------------------------------------------------------------------------------------------------------------------------|
| Direct impacts                                  | Direct occupational impacts in a specific sector. These are based on the reported BLS cases (converted to DALYs).                                                                                                                                                                                                                                                                                              |
| Supply chain impacts                            | Indirect occupational impacts in the supply chain of a specific sector. These are based on the IO, inter-sector demand from the BEA and the direct impacts noted above. For example, if sector A has demand for sector B of X (\$/\$), and sector B has impacts of Y/\$, then A has indirect impacts in B of X*Y.                                                                                              |
| Supply chain impact outside the producer sector | Indirect occupational impacts occurred in other sectors of the supply chain                                                                                                                                                                                                                                                                                                                                    |
| Supply chain impact in producer sector          | Indirect occupational impacts occurred in the producer sector due to the need of supply chain                                                                                                                                                                                                                                                                                                                  |
| Total impacts                                   | The sum of direct impacts and supply chain impacts                                                                                                                                                                                                                                                                                                                                                             |
| Total output                                    | The sum of the values of final goods and services produced by the industry. This value is used to calculate direct impact factors occurred in a specific sector. For example, “ <i>Other real estate</i> ” has one of the highest outputs (889.33 billion \$), while “ <i>Doll, toy, and game manufacturing</i> ” has one of the lowest (1.8 billion \$).                                                      |
| Final demand                                    | The value of purchases made by final users (Final demand = total output - intermediate output used in intra-industries). This value is used to calculate the direct CFs, supply chain CFs, and total CFs. For example, “ <i>Owner-occupied housing</i> ” has one of the highest demands (1276.28 billion \$), while “ <i>Lime and gypsum product manufacturing</i> ” has one of the lowest (0.014 billion \$). |
| Direct impact factors                           | Characterization factors (CFs) for direct occupational health impacts occurred in a specific sector (Direct impact factors = direct impacts/total output, DALYs/\$ <sub>output</sub> )                                                                                                                                                                                                                         |
| Direct CFs ( $CF_D$ )                           | Characterization factors (CFs) for direct occupational health impacts occurred in a specific sector (Direct CFs = direct impacts/final demand, DALYs/\$ <sub>demand</sub> )                                                                                                                                                                                                                                    |
| Supply chain CFs ( $CF_{SC}$ )                  | Characterization factors (CFs) for indirect occupational health impacts occurred in a specific sector (Supply chain CFs = supply chain impacts/final demand, DALYs/\$ <sub>demand</sub> )                                                                                                                                                                                                                      |
| Total CFs ( $CF_{total}$ )                      | The sum of $CF_D$ and $CF_{SC}$ (DALYs/\$ <sub>demand</sub> )                                                                                                                                                                                                                                                                                                                                                  |

The total demand can be calculated as follow:

$$Total\ demand = (\mathbf{I} - \mathbf{A})^{-1} \vec{y} = \vec{y} + (\mathbf{I} - \mathbf{A})^{-1} \mathbf{A} \vec{y} \quad (\text{Eq. S1})$$

where  $\mathbf{I}$  represents the identity matrix and  $\mathbf{A}$  represents the direct requirement matrix.  $\vec{y}$  is the direct demand per FU to the manufacturer of a product, then  $\mathbf{A} \vec{y}$  the indirect demand per FU in the supply chain of the product manufacturer. Eq. S1 shows that the



total demand is the sum of the direct demand and indirect demand. Joining Eq. 8, Eq. 9, and Eq. 11 (in the manuscript), we can get:

$$CF_D = \overline{y} \overline{ld} \mathbf{B} \vec{y} \quad (\text{Eq. S2})$$

$$CF_{SC} = \overline{y} \overline{ld} \mathbf{B} (\mathbf{I} - \mathbf{A})^{-1} \mathbf{A} \vec{y} \quad (\text{Eq. S3})$$

$$CF_{total} = CF_D + CF_{SC} \quad (\text{Eq. S4})$$

where  $\mathbf{B}$  is an interference matrix to combine direct impact factors for occupational health impacts with IO analysis (i.e., indirect occupational health impacts) to analyze product life-cycle impacts covering all supply chains in an economic system. And

$(\mathbf{I} - \mathbf{A})^{-1}$  is the Leontief inverse matrix and each column of the matrix represents the total production of different industries required to produce one dollar of that good, and the units of its rows are all in dollars (\$/\$). The vector  $\vec{y}$  is the final demand vector for each good in the manufacturing stage in \$ per good (\$/functional unit).

#### **Section S2.4: Conversion from NAICE code to EIO code**

Since the injury data provided by the U.S. Bureau of Labor Statistics are classified according to the NAICS code, the matrix related to the input-output analysis to be used in subsequent calculations uses the EIO code classification. Therefore, we need to use a matrix to convert the data of these two classifications. We correspond the industries classified by NAICS code to the industries classified by EIO code and find that they can be divided into two major categories. One is that NAICS code corresponds to more than one EIO code, and the other is that NAICS code corresponds to only one EIO code (EIO code can correspond to more than one NAICS code). The former case is weighted according to the total product supply of different industries corresponding to EIO code, while the latter can directly correspond one by one.

#### **Section S2.5: Structural Path Analysis (SPA)**

The Leontief inverse matrix of the input-output model reflects the cumulative effect of industry chain paths and provides a basis for extracting industry chain paths within the economic system. By combining the input-output model with structural path analysis, the main industry chain paths leading to environmental stress in the economic system can be extracted. For example, the chain path "agriculture-food-restaurant-consumer" indicates that the consumption in restaurants drives food production, and food production further drives environmental stress in the agricultural sectors.<sup>11</sup> With

the Taylor expansion, the Leontief inverse matrix can be written as follows (Eq. S7 and Eq. S8).

$$(\mathbf{I} - \mathbf{A})^{-1} = \mathbf{I} + \mathbf{A} + \mathbf{A}^2 + \mathbf{A}^3 + \dots \quad (\text{Eq. S7})$$

$$e = f\mathbf{y} + f\mathbf{A}\mathbf{y} + f\mathbf{A}^2\mathbf{y} + f\mathbf{A}^3\mathbf{y} + \dots \quad (\text{Eq. S8})$$

where  $\mathbf{I}$  represents identity matrix and  $\mathbf{A}$  represents direct requirement matrix. Each term on the right-hand side shows the workplace occupational health impact for a specific production layer. SPA extracts the individual supply chain pathways that contribute to the workplace occupational health impact for each production layer. Suppose a supply chain starts in department  $i$ , passes through  $r$  departments ( $k_1, k_2, \dots, k_r$ ) and ends in department  $j$ . The emissions from this supply chain pathway (i.e., the emissions generated in sector  $i$ , driven by the final demand for the product in sector  $j$ ) are estimated by the formula as follows (Eq. S9).

$$c_{SPA} = e_i \mathbf{a}_{ik_1} \mathbf{a}_{k_1 k_2} \dots \mathbf{a}_{k_r j} f_j \quad (\text{Eq. S9})$$

where  $c_{SPA}$  represents the workplace occupational health impact of a supply chain pathway and  $\mathbf{a}_{ik_1}, \mathbf{a}_{k_1 k_2}, \dots$  are the elements of matrix  $\mathbf{A}$ . In this study, we only consider the first two production layers because they already account for 82% of all workplace occupational health impacts in the United States.

### Section S3: Additional notes on results

#### Section S3.1: Direct impacts of occupational health

In order to explain the fact that there is not an exact positive correlation between the number of cases and total occupational health impacts in a specific industry sector, we provide Figure S2 to compare with Figure 1 in the manuscript.

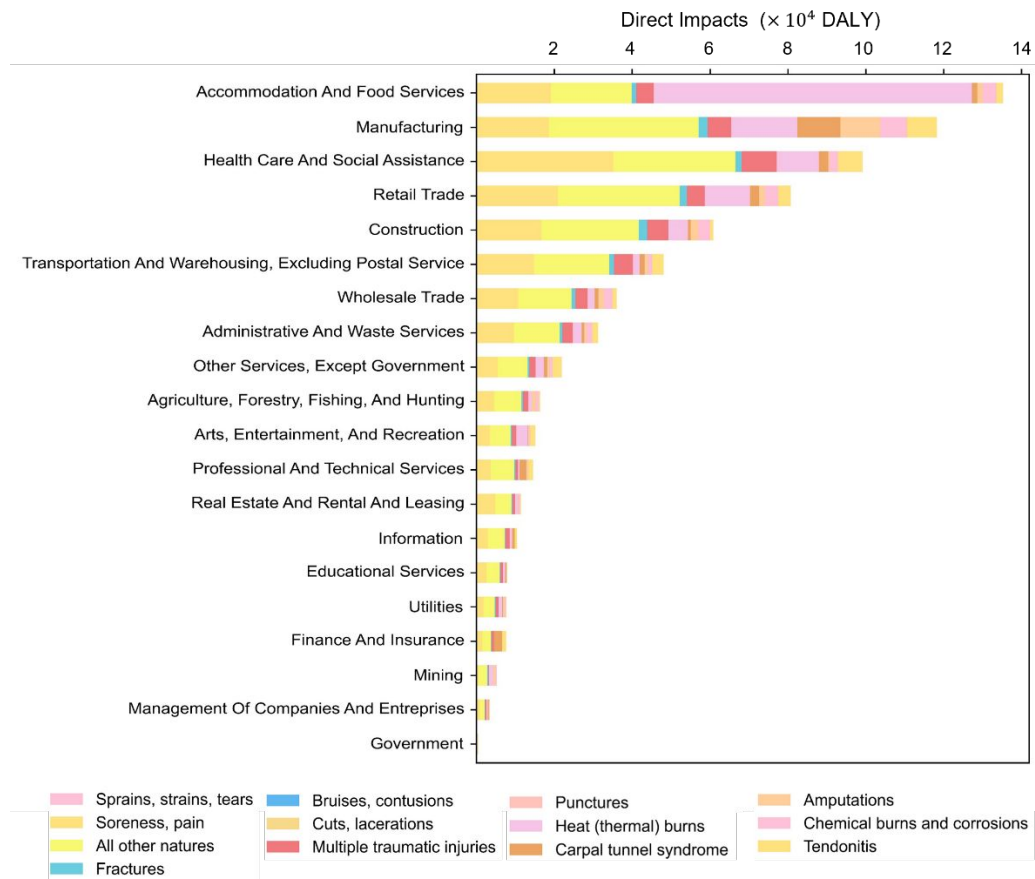

**Figure S2.** Direct impacts of different injuries and illnesses contributed to different industry groups.

When comparing Figure S2 and Figure 1 in the manuscript, we can find that soreness and pain, heat burns and all other natures contribute most in DALY while sprains, strains and tears contribute most in cases. That is because sprains, strains and tears are considered as short-term injuries, which makes them have short duration with low severity. And through Equation 4 in the manuscript, the occupational health impacts of this injury become low in DALY.

### Section S3.2: Total impacts of occupational health (shown in a tree map)

To reduce the occupational health impact of products, more attention should be paid to these sectors. So, in Figure S3, we transform the style of a mosaic plot (Figure 3 in the manuscript) into a tree map (the same style as Figure 2 in the manuscript) to focus on the economic sectors with high occupational health impacts over the entire supply chain.

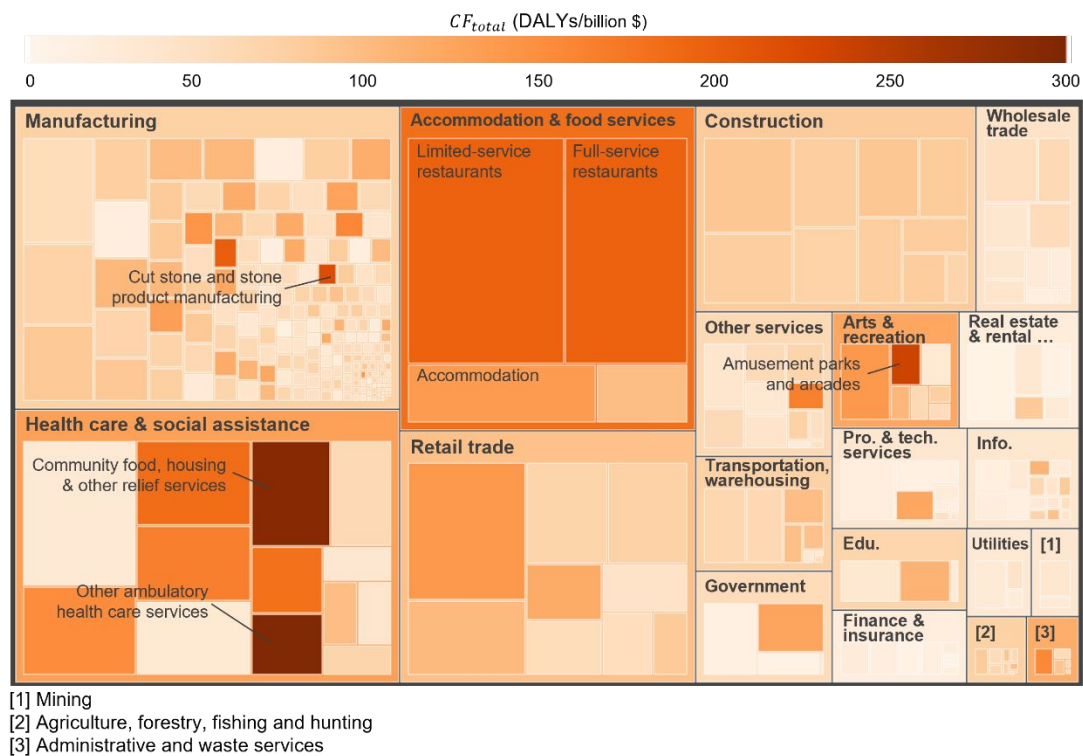

**Figure S3** Total characterization factors (CF) and total impacts of different industries: the size of the squares represents total impacts of occupational health for the industry; the shade of the color of the squares represents total CF (the darker the color, the greater the  $CF_{total}$ ). To avoid double counting, we use final demand as the denominator to calculate  $CF_{total}$ .

Comparing Figure 2 in the manuscript and Figure S3, “*Manufacturing*” and “*Health care and social assistance*” surpass “*Accommodation and food services*” becoming the first and second economic sectors in terms of occupational health impacts. This indicates that the occupational health impacts of these two economic sectors are mainly influenced by their different supply chains, where the supply chain of “*Manufacturing*” is generally also “*Manufacturing*” itself, while the supply chain of “*Health care and social assistance*” is very complex and diverse. In the contrast, the supply chain of “*Accommodation and food services*” is simple,<sup>12</sup> and the occupational health impacts

of it come mainly from the industry itself, so the change before and after is relatively small. Besides, Figure 1 in the manuscript uses total output for the calculation, while Figure S1 uses total demand instead. That is because the double counting problem mentioned before only exists after considering the supply chain. That's why the two figures cannot be directly compared.

### **Section S3.3: Result variation between years**

The number and type of nonfatal injuries and illnesses vary from year to year. For example, there were 16% more reported injuries and illnesses in the “*Fruit and tree nut farming*” industry in 2016 than in 2018. To ensure that the derived CFs are representative of typical health outcomes associated with occupational injuries and illnesses (rather than a particularly dangerous or safe year), we collected case data and calculated DALYs for 5-years, and set the CF for each industry based on the 5-year average data.

We used average injury and illness data for five years to evaluate the occupational health impacts by industry in the US. This use of averages represents typical levels of workplace hazards (i.e., central tendency values). An alternate health-protective approach could use the highest values over a period of time, which may be more representative of the potential impact approach commonly used in LCA. Here, we investigate the impact of the use of five-year averages on our derived characterization factors and case study results.

Figure S4 shows the number and mix of nonfatal injury and illness cases reported by year and aggregated into 20 industry groups (for ease of visualization). At this aggregate level, the ranking of sector groups by number of incidents remains the same and the mix of injuries and illnesses within each sector group is similar. However, there is more variation at the industry level (Figures S5 and S6).

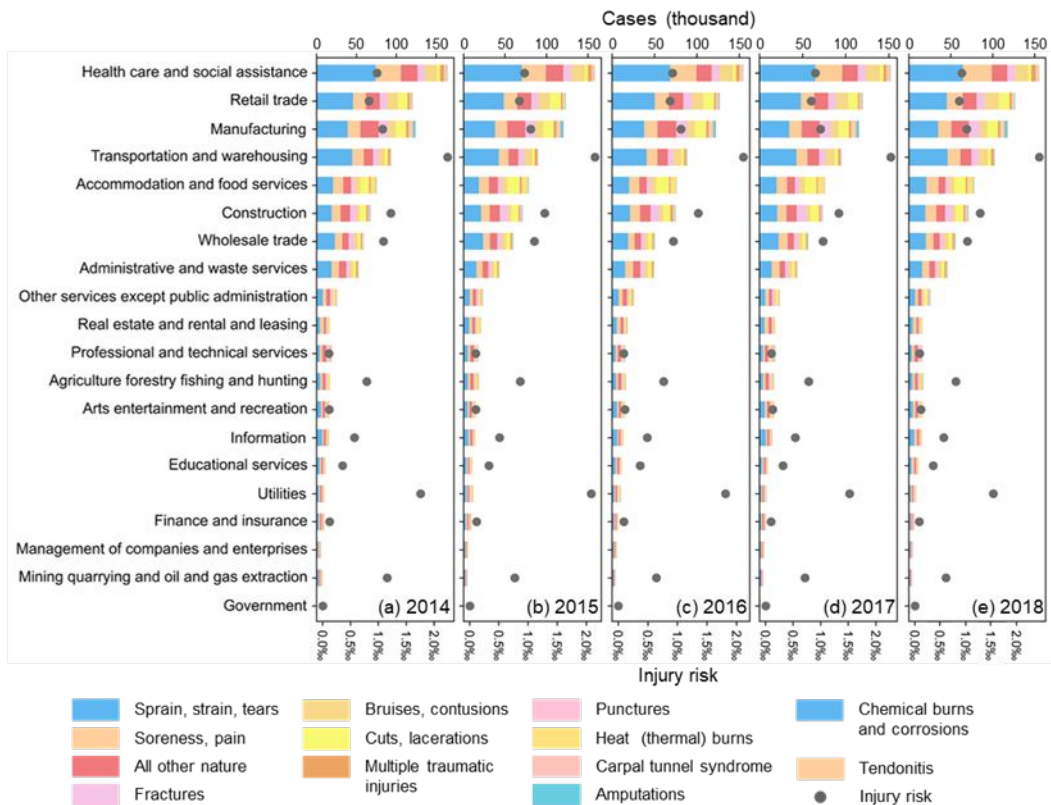

**Figure S4.** Cases of various injuries and risks of different injuries and illnesses in different industry groups for five years. Note that not all industry groups can report this ratio due to missing data on the number of employees in some industry groups (e.g., *real estate and rental and lending*).

We further plotted the figure to compare the difference of characterization factors (CFs) for 397 US industries of these five years with the average ones to investigate the impact of this variation on measured impact. Through Figure S5, we found a strong positive correlation with the line of equality since the line of equality is derived as the average of the other annual values. Figure S6 shows the relative difference between the calculated CFs for a given year with the average calculated CFs. While the CFs for two years (2014, 2015) were more similar to the average CFs, other years were on average more dangerous (mean relative difference of +43% in 2016) or safer (mean relative difference of -21% in 2017 and -15% in 2018). We believe that derived CFs should represent typical levels of workplace hazards (i.e., central tendency values). Therefore, to avoid the potential for selecting a particularly dangerous or safe year and skewing the CFs accordingly, we use 5-year averages to obtain typical CFs. Some LCA researchers and practitioners may argue that a precautionary approach would require the use of health-protective values, or the highest CFs obtained over a period of time.

For researchers and practitioners interested in such an approach, we provided the CFs derived for each industry and year on GitHub.

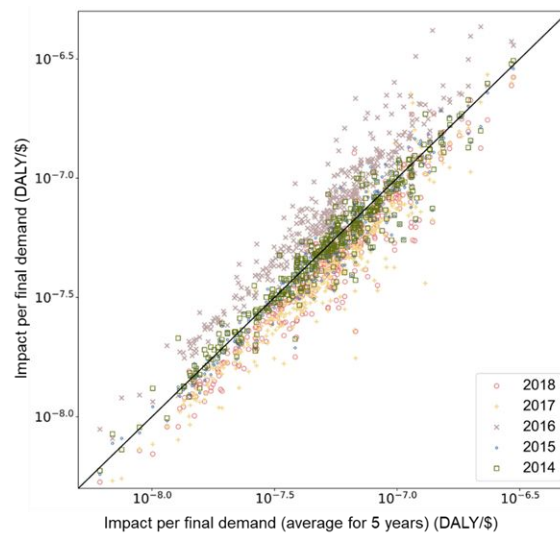

**Figure S5.** Characterization factors (CFs) for 397 US industries for 5 years compared with the average ones.

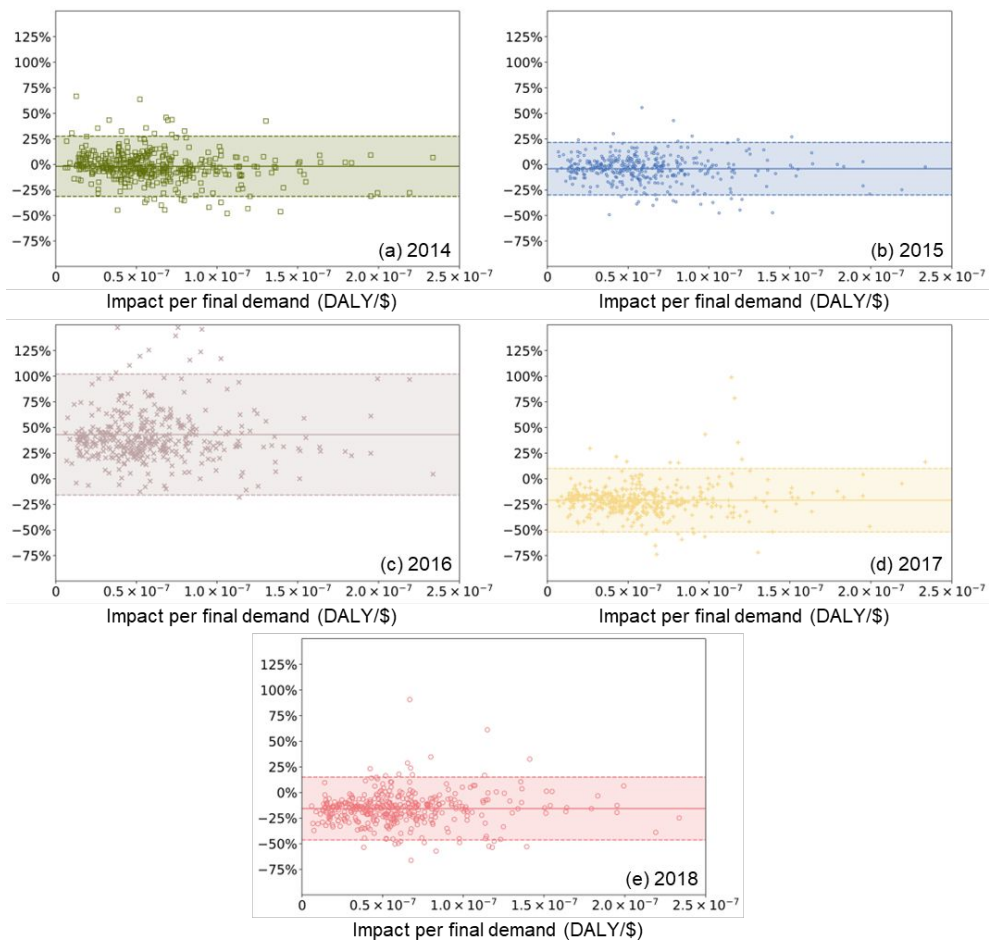

**Figure S6.** The relative difference between the calculated CFs for five years with the average calculated CFs

### Section S3.4: Structural path analysis of the U.S. economy

We further identified key supply chain pathways that have an impact on the occupational health of U.S. workers in the work environment (Table S6). The top 20 supply chain pathways all contain only one industry sector and take up more than 35% of total work environment occupational health impacts through the entire economic system. Among them, food service, construction, and transportation had the highest work environment occupational health impacts. This might be due to the large number of workers and low economic output required in these economic sectors, as well as the low education level of workers and a much more hazardous work environment.

**Table S6. The top 20 pathways with the greatest impact on occupational health in the work environment in the U.S. economic system**

| Percentage | Direct Impacts | Path                                                                                  |
|------------|----------------|---------------------------------------------------------------------------------------|
| 5.71%      | 3.70E+04       | Limited-service restaurants                                                           |
| 5.10%      | 3.31E+04       | Full-service restaurants                                                              |
| 3.05%      | 1.98E+04       | Food and beverage stores                                                              |
| 2.01%      | 1.30E+04       | Individual and family services                                                        |
| 1.88%      | 1.22E+04       | Accommodation                                                                         |
| 1.71%      | 1.11E+04       | Outpatient care centers                                                               |
| 1.62%      | 1.05E+04       | Offices of other health practitioners                                                 |
| 1.57%      | 1.02E+04       | Motor vehicle and parts dealers                                                       |
| 1.56%      | 1.01E+04       | General merchandise stores                                                            |
| 1.46%      | 9.47E+03       | Community food, housing, and other relief services, including rehabilitation services |
| 1.19%      | 7.72E+03       | Other residential structures                                                          |
| 1.17%      | 7.58E+03       | Other amusement and recreation industries                                             |
| 1.09%      | 7.09E+03       | Offices of physicians                                                                 |
| 1.06%      | 6.87E+03       | All other food and drinking places                                                    |
| 1.06%      | 6.85E+03       | All other retail                                                                      |
| 0.97%      | 6.29E+03       | Single-family residential structures                                                  |
| 0.96%      | 6.20E+03       | Hospitals                                                                             |
| 0.89%      | 5.77E+03       | Transportation structures and highways and streets                                    |
| 0.88%      | 5.69E+03       | Other ambulatory health care services                                                 |
| 0.87%      | 5.65E+03       | Nursing and community care facilities                                                 |

### Section S3.5: Structural path analysis of the office chair

Through structural path analysis, we can find that the main source of the occupational health impacts of the work environment of office chairs is veneer, plywood and engineered wood product manufacturing. There are 6 paths related to it in the top 10 paths, so whether directly or indirectly, its impact cannot be ignored. This industry includes processes such as wood cutting and wood component manufacturing,



which are highly hazardous. Therefore, if we want to consider reducing the occupational health impact of this product in the work environment, we should improve the technology in this specific industry (Table S7).

**Table S7. 10 paths with the greatest impact on occupational health in the work environment in the production of office chairs**

| Percentage | Direct Impact | Path                                                                                                                                |
|------------|---------------|-------------------------------------------------------------------------------------------------------------------------------------|
| 30.24%     | 2.98E-06      | Veneer, plywood, and engineered wood product manufacturing                                                                          |
| 11.46%     | 1.13E-06      | Urethane and other foam product (except polystyrene) manufacturing                                                                  |
| 4.02%      | 3.96E-07      | Sawmills and wood preservation → Veneer, plywood, and engineered wood product manufacturing                                         |
| 3.44%      | 3.39E-07      | Veneer, plywood, and engineered wood product manufacturing → Veneer, plywood, and engineered wood product manufacturing             |
| 3.23%      | 3.18E-07      | Paperboard container manufacturing                                                                                                  |
| 2.79%      | 2.75E-07      | Plastics material and resin manufacturing                                                                                           |
| 1.64%      | 1.61E-07      | Forestry and logging → Veneer, plywood, and engineered wood product manufacturing                                                   |
| 1.50%      | 1.47E-07      | Textile and fabric finishing and fabric coating mills                                                                               |
| 1.30%      | 1.27E-07      | Other durable goods merchant wholesalers → Veneer, plywood, and engineered wood product manufacturing                               |
| 0.94%      | 9.31E-08      | Forestry and logging → Support activities for agriculture and forestry → Veneer, plywood, and engineered wood product manufacturing |

## Section S4: Uncertainty and sensitivity analysis

### Section S4.1: Uncertainty sources

To ensure that the results of this study are reliable, an uncertainty analysis needs to be performed. Because the data volume is small, the analysis was finally performed by the Monte Carlo method. This was done by assigning the corresponding distributions to all parameters for which there was uncertainty (see Table S8-9 for details) and conducting 1000 sampling for each of the five years of data, and finally fitting the distribution to a mixture of 5000 data samples. The results of the applied distribution fitting were compared with the data from the study by Kijko et al.<sup>13</sup>

**Table S8. Parameters and their distributions**

| Variable Name                                                         | Symbol       | Distribution | Parameters               |
|-----------------------------------------------------------------------|--------------|--------------|--------------------------|
| Severity of short-term injuries and illnesses                         | $W_{c,ST}$   | lognormal    | Average, Deviation       |
| Severity of lifelong injuries and illnesses                           | $W_{c,LL}$   | lognormal    | Average, Deviation       |
| Duration of short-term injuries and illnesses by different age groups | $D_{c,a,ST}$ | uniform      | Range (10%) <sup>a</sup> |
| Duration of lifelong injuries and illnesses by different age groups   | $D_{c,a,LL}$ | uniform      | Range (10%) <sup>a</sup> |

a: This range is assumed by authors.

**Table S9. Distribution of severity of different injuries and illnesses**

| Type of injuries or illnesses from U.S. Bureau of Labor Statistics | Short-term           |                        | Lifelong             |                        |
|--------------------------------------------------------------------|----------------------|------------------------|----------------------|------------------------|
|                                                                    | Average <sup>a</sup> | Deviation <sup>b</sup> | Average <sup>c</sup> | Deviation <sup>b</sup> |
| Sprains, strains, tears                                            | 0.0075               | 0.68                   | 0                    | 0                      |
| Fractures                                                          | 0.1081               | 0.85                   | 0.067                | 0.85                   |
| Cuts, lacerations                                                  | 0.0058               | 0.68                   | 0.011                | 0                      |
| Puncture wounds                                                    | 0.0058               | 0.68                   | 0.011                | 0                      |
| Bruises, contusions                                                | 0.0075               | 0.68                   | 0.008                | 0                      |
| Heat burns                                                         | 0.2772               | 0.73                   | 0.180                | 0.73                   |
| Chemical burns                                                     | 0.2772               | 0.73                   | 0.180                | 0.73                   |
| Amputations                                                        | 0.0000               | 0.68                   | 0.044                | 0.68                   |
| Carpal tunnel syndrome                                             | 0.0638               | 0.68                   | 0.113                | 0.68                   |
| Tendonitis                                                         | 0.0000               | 0.68                   | 0.187                | 0.68                   |
| Multiple traumatic injuries                                        | 0.1392               | 0.68                   | 0.058                | 0.68                   |
| Soreness, pain                                                     | 0.0610               | 0.68                   | 0.061                | 0                      |
| Unspecified nonfatal injuries                                      | 0.0388               | 0.7025                 | 0.072                | 0.7186                 |

a: This average comes from James et al.<sup>9</sup> work.

b: These deviations are assumed based on Global Burden of Disease report.

c: This average comes from U.S. Bureau of Labor Statistics.

## Section S4.2: Results of the uncertainty analysis

The uncertainty of this study mainly comes from the severity and duration of each injury or illness. The collected data samples mentioned above were calculated separately for the case study, and then the corresponding 5,000 results were obtained. These results were fitted to the distribution according to the density, and the distributions are shown in Figure S4. We found that the best-fitting distribution was the gamma distribution (Figure S7 (a)), while the log-normal distribution (Figure S7 (b)) also had a good fit. Although both distributions have long trailing tails on the right-hand side and low values at the top, the rest of the fitted distributions are too complex without a significant improvement in the fit, so it is finally concluded that the gamma distribution and the lognormal distribution can characterize the uncertainty situation of the framework.

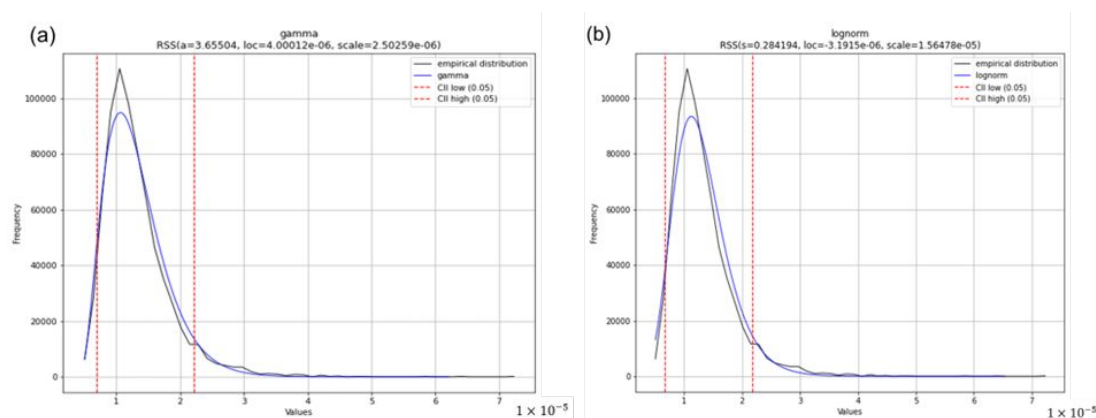

**Figure S7.** Distribution Fitting for 5000 samples; (a) gamma distribution; (b) lognormal distribution; loc here represents mean, and scale represents standard deviation; RSS represents Residual Sum of Squares (a method to compute the goodness of fit test)

## Section S4.3: Sensitivity analysis

We mentioned in the manuscript that the fraction of cases that result in short-term or lifelong health outcomes based on the study of Scanlon et al. and GBD reports is the major assumption in our study. Scanlon et al. (2013) assumed short-term duration for all communicable illnesses, and life-long duration for all non-communicable illnesses, and assigned the fractions of cases that result in short-term or lifelong health outcomes by matching BLS nature codes with GBD sequelae and assigning short-term and life-long fractions accordingly. For injuries, Scanlon et al. (2013) adopted the GBD's assignment of short-term and lifelong duration including for injuries that the GBD assigned as being experienced as short-term for some percentage of the population and

lifelong for the remaining percentage. This “split” occurred for approximately four of the injuries. We adopted the assumptions used in Scanlon et al.’s study with two adjustments as noted in Table S4.

Estimates of the fraction of cases with short-term and life-long health outcomes are highly uncertain. For example, global burden of injury studies estimate the probability of long-term health outcomes based on patient-reported outcome data from three countries (China, Netherlands, and the USA).<sup>14, 15</sup> This resulted in a large range of probabilities of long-term outcomes were some nature-of-injury categories, with some values having to be adjusted because they resulted in an implausibly high burden of disease.<sup>15</sup> For example, the global probability of long-term health loss for a dislocated hip ranged from approximately 20% to just under 100%. To understand the impact of this uncertainty on our results, we conducted a local sensitivity analysis by changing the fraction of lifelong health outcomes for each injury or illness by 10% (except for “Amputation” as we assumed its impact is always lifelong), and compared the results with the baseline. We plotted Figure S8 to justify the sensitivity of industries to different injuries and illnesses.

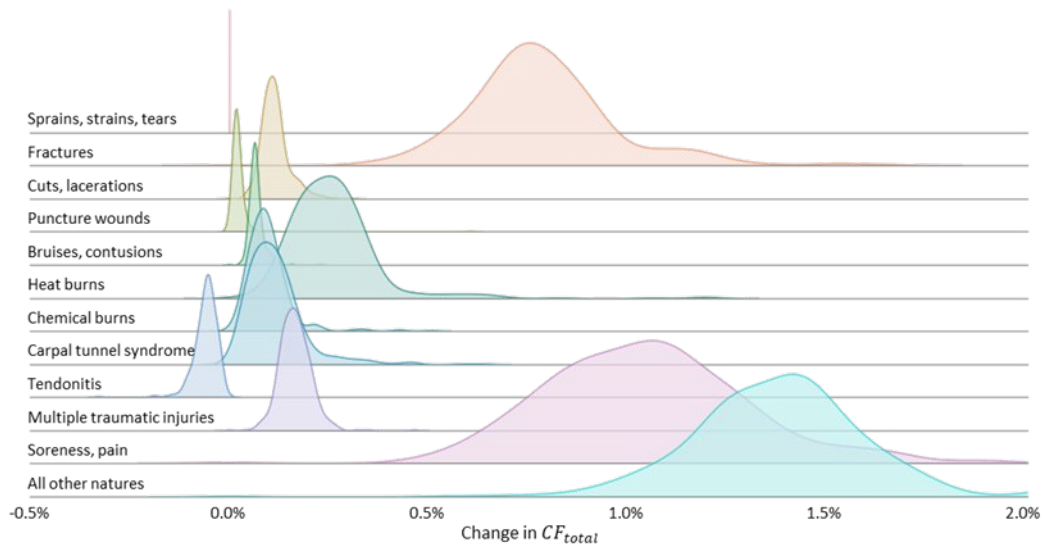

**Figure S8.** The distribution of the changes in total CFs for the sensitivity analysis. “Amputation” is dropped because it is always lifelong, and “Tendonitis” is declining 1% because it is lifelong due to baseline.

To investigate the sensitivity of industries to different injuries and illnesses, we noted that the changes in total CFs are all lower than 2% due to Figure S8. Among all injuries and illnesses, “Soreness, pain” and “All other nature” contains the largest changes, which justifies that the lifelong split coefficient of these two injuries might affect the total CFs most. It is because the lifelong split coefficient of these two injuries cannot match the GBD report classification directly, and we did the mapping and some assumptions. Further studies can be done due to these results.

**Section S5: New dataset developed in this study**

**Section S5.1: Dataset of direct impact factors of occupational health impacts (Excel version available in [GitHub](#))**

**Table S10. Direct impact factors of occupational health impacts (398 sectors)**

| <b>EIO Code</b> | <b>Economic Sectors</b>                                                               | <b>Direct impact factors (DALY/\$)</b> |
|-----------------|---------------------------------------------------------------------------------------|----------------------------------------|
| 621900          | Other ambulatory health care services                                                 | 2.936E-07                              |
| 624A00          | Community food, housing, and other relief services, including rehabilitation services | 2.712E-07                              |
| 722211          | Limited-service restaurants                                                           | 2.034E-07                              |
| 327991          | Cut stone and stone product manufacturing                                             | 1.933E-07                              |
| 722110          | Full-service restaurants                                                              | 1.797E-07                              |
| 713100          | Amusement parks and arcades                                                           | 1.732E-07                              |
| 115000          | Support activities for agriculture and forestry                                       | 1.678E-07                              |
| 33712N          | Other household nonupholstered furniture                                              | 1.671E-07                              |
| 623B00          | Residential mental health, substance abuse, and other residential care facilities     | 1.626E-07                              |
| 624100          | Individual and family services                                                        | 1.583E-07                              |
| 621300          | Offices of other health practitioners                                                 | 1.544E-07                              |
| 722A00          | All other food and drinking places                                                    | 1.481E-07                              |
| 812300          | Dry-cleaning and laundry services                                                     | 1.407E-07                              |
| 561700          | Services to buildings and dwellings                                                   | 1.378E-07                              |
| 621400          | Outpatient care centers                                                               | 1.335E-07                              |
| 5191A0          | News syndicates, libraries, archives and all other information services               | 1.221E-07                              |
| 334610          | Manufacturing and reproducing magnetic and optical media                              | 1.114E-07                              |
| 331520          | Nonferrous metal foundries                                                            | 1.110E-07                              |
| 112120          | Dairy cattle and milk production                                                      | 1.097E-07                              |
| 3219A0          | All other wood product manufacturing                                                  | 1.089E-07                              |
| 221300          | Water, sewage and other systems                                                       | 1.049E-07                              |
| 611B00          | Other educational services                                                            | 1.042E-07                              |

---

|        |                                                                               |           |
|--------|-------------------------------------------------------------------------------|-----------|
| 445000 | Food and beverage stores                                                      | 1.021E-07 |
| 485000 | Transit and ground passenger transportation                                   | 1.020E-07 |
| 541940 | Veterinary services                                                           | 1.014E-07 |
| 512200 | Sound recording industries                                                    | 1.014E-07 |
| 721000 | Accommodation                                                                 | 9.993E-08 |
| 811400 | Personal and household goods repair and maintenance                           | 9.904E-08 |
| 327390 | Other concrete product manufacturing                                          | 9.865E-08 |
| 33721A | Office furniture and custom architectural woodwork and millwork manufacturing | 9.794E-08 |
| 713900 | Other amusement and recreation industries                                     | 9.524E-08 |
| 532A00 | General and consumer goods rental                                             | 9.403E-08 |
| 337110 | Wood kitchen cabinet and countertop manufacturing                             | 9.302E-08 |
| 331510 | Ferrous metal foundries                                                       | 9.094E-08 |
| 332420 | Metal tank (heavy gauge) manufacturing                                        | 8.948E-08 |
| 712000 | Museums, historical sites, zoos, and parks                                    | 8.900E-08 |
| 493000 | Warehousing and storage                                                       | 8.804E-08 |
| 336611 | Ship building and repairing                                                   | 8.552E-08 |
| 621500 | Medical and diagnostic laboratories                                           | 8.539E-08 |
| 337127 | Institutional furniture manufacturing                                         | 8.509E-08 |
| 336213 | Motor home manufacturing                                                      | 8.360E-08 |
| 337122 | Nonupholstered wood household furniture manufacturing                         | 8.207E-08 |
| 321100 | Sawmills and wood preservation                                                | 8.186E-08 |
| 314120 | Curtain and linen mills                                                       | 8.040E-08 |
| 332800 | Coating, engraving, heat treating and allied activities                       | 7.864E-08 |
| 334300 | Audio and video equipment manufacturing                                       | 7.755E-08 |
| 561600 | Investigation and security services                                           | 7.650E-08 |
| 811200 | Electronic and precision equipment repair and maintenance                     | 7.364E-08 |
| 336212 | Truck trailer manufacturing                                                   | 7.325E-08 |
| 114000 | Fishing, hunting and trapping                                                 | 7.257E-08 |
| 441000 | Motor vehicle and parts dealers                                               | 7.172E-08 |

---

---

|        |                                                                                 |           |
|--------|---------------------------------------------------------------------------------|-----------|
| 337900 | Other furniture related product manufacturing                                   | 7.079E-08 |
| 339930 | Doll, toy, and game manufacturing                                               | 6.919E-08 |
| 48A000 | Scenic and sightseeing transportation and support activities for transportation | 6.902E-08 |
| 333514 | Special tool, die, jig, and fixture manufacturing                               | 6.880E-08 |
| 233230 | Manufacturing structures                                                        | 6.839E-08 |
| 311810 | Bread and bakery product manufacturing                                          | 6.787E-08 |
| 327100 | Clay product and refractory manufacturing                                       | 6.728E-08 |
| 332320 | Ornamental and architectural metal products manufacturing                       | 6.697E-08 |
| 316000 | Leather and allied product manufacturing                                        | 6.630E-08 |
| 444000 | Building material and garden equipment and supplies dealers                     | 6.533E-08 |
| 311520 | Ice cream and frozen dessert manufacturing                                      | 6.513E-08 |
| 315000 | Apparel manufacturing                                                           | 6.512E-08 |
| 332310 | Plate work and fabricated structural product manufacturing                      | 6.415E-08 |
| 233240 | Power and communication structures                                              | 6.308E-08 |
| 233262 | Educational and vocational structures                                           | 6.241E-08 |
| 335224 | Household laundry equipment manufacturing                                       | 6.205E-08 |
| 483000 | Water transportation                                                            | 6.135E-08 |
| 335110 | Electric lamp bulb and part manufacturing                                       | 6.131E-08 |
| 336612 | Boat building                                                                   | 6.127E-08 |
| 332114 | Custom roll forming                                                             | 6.062E-08 |
| 321200 | Veneer, plywood, and engineered wood product manufacturing                      | 6.058E-08 |
| 314900 | Other textile product mills                                                     | 5.998E-08 |
| 336211 | Motor vehicle body manufacturing                                                | 5.993E-08 |
| 332913 | Plumbing fixture fitting and trim manufacturing                                 | 5.974E-08 |
| 311990 | All other food manufacturing                                                    | 5.962E-08 |
| 711100 | Performing arts companies                                                       | 5.886E-08 |
| 334512 | Automatic environmental control manufacturing                                   | 5.785E-08 |
| 111900 | Other crop farming                                                              | 5.752E-08 |
| 2332A0 | Office and commercial structures                                                | 5.728E-08 |

---



---

|        |                                                                          |           |
|--------|--------------------------------------------------------------------------|-----------|
| 327330 | Concrete pipe, brick, and block manufacturing                            | 5.716E-08 |
| 2332D0 | Other nonresidential structures                                          | 5.706E-08 |
| 334111 | Electronic computer manufacturing                                        | 5.690E-08 |
| 233411 | Single-family residential structures                                     | 5.686E-08 |
| 336214 | Travel trailer and camper manufacturing                                  | 5.640E-08 |
| 4B0000 | All other retail                                                         | 5.620E-08 |
| 447000 | Gasoline stations                                                        | 5.608E-08 |
| 230302 | Residential maintenance and repair                                       | 5.588E-08 |
| 2332C0 | Transportation structures and highways and streets                       | 5.584E-08 |
| 233412 | Multifamily residential structures                                       | 5.544E-08 |
| 233210 | Health care structures                                                   | 5.489E-08 |
| 5111A0 | Directory, mailing list, and other publishers                            | 5.445E-08 |
| 326140 | Polystyrene foam product manufacturing                                   | 5.396E-08 |
| 111300 | Fruit and tree nut farming                                               | 5.381E-08 |
| 2334A0 | Other residential structures                                             | 5.280E-08 |
| 230301 | Nonresidential maintenance and repair                                    | 5.246E-08 |
| 624400 | Child day care services                                                  | 5.187E-08 |
| 813A00 | Grantmaking, giving, and social advocacy organizations                   | 5.180E-08 |
| 812900 | Other personal services                                                  | 5.134E-08 |
| 337121 | Upholstered household furniture manufacturing                            | 5.088E-08 |
| 335228 | Other major household appliance manufacturing                            | 5.068E-08 |
| 332996 | Fabricated pipe and pipe fitting manufacturing                           | 5.011E-08 |
| 335912 | Primary battery manufacturing                                            | 4.963E-08 |
| 327320 | Ready-mix concrete manufacturing                                         | 4.957E-08 |
| 339990 | All other miscellaneous manufacturing                                    | 4.943E-08 |
| 486000 | Pipeline transportation                                                  | 4.894E-08 |
| 326120 | Plastics pipe, pipe fitting, and unlaminated profile shape manufacturing | 4.853E-08 |
| 561400 | Business support services                                                | 4.814E-08 |
| 333517 | Machine tool manufacturing                                               | 4.731E-08 |

---

---

|        |                                                                                                  |           |
|--------|--------------------------------------------------------------------------------------------------|-----------|
| 335311 | Power, distribution, and specialty transformer manufacturing                                     | 4.730E-08 |
| 332710 | Machine shops                                                                                    | 4.667E-08 |
| 311615 | Poultry processing                                                                               | 4.635E-08 |
| 327400 | Lime and gypsum product manufacturing                                                            | 4.558E-08 |
| 321910 | Millwork                                                                                         | 4.478E-08 |
| 326130 | Laminated plastics plate, sheet (except packaging), and shape manufacturing                      | 4.387E-08 |
| 337215 | Showcase, partition, shelving, and locker manufacturing                                          | 4.373E-08 |
| 339114 | Dental equipment and supplies manufacturing                                                      | 4.317E-08 |
| 452000 | General merchandise stores                                                                       | 4.239E-08 |
| 33351B | Cutting and machine tool accessory, rolling mill, and other metalworking machinery manufacturing | 4.238E-08 |
| 423A00 | Other durable goods merchant wholesalers                                                         | 4.221E-08 |
| 334510 | Electromedical and electrotherapeutic apparatus manufacturing                                    | 4.209E-08 |
| 313300 | Textile and fabric finishing and fabric coating mills                                            | 4.185E-08 |
| 446000 | Health and personal care stores                                                                  | 4.157E-08 |
| 481000 | Air transportation                                                                               | 4.065E-08 |
| 313200 | Fabric mills                                                                                     | 4.050E-08 |
| 335120 | Lighting fixture manufacturing                                                                   | 3.997E-08 |
| 623A00 | Nursing and community care facilities                                                            | 3.990E-08 |
| 33211A | All other forging, stamping, and sintering                                                       | 3.989E-08 |
| 333994 | Industrial process furnace and oven manufacturing                                                | 3.989E-08 |
| 312120 | Breweries                                                                                        | 3.969E-08 |
| 812200 | Death care services                                                                              | 3.896E-08 |
| 332999 | Other fabricated metal manufacturing                                                             | 3.886E-08 |
| 112A00 | Animal production, except cattle and poultry and eggs                                            | 3.881E-08 |
| 326220 | Rubber and plastics hoses and belting manufacturing                                              | 3.864E-08 |
| 312110 | Soft drink and ice manufacturing                                                                 | 3.850E-08 |
| 484000 | Truck transportation                                                                             | 3.772E-08 |
| 332600 | Spring and wire product manufacturing                                                            | 3.715E-08 |
| 333511 | Industrial mold manufacturing                                                                    | 3.665E-08 |

---

---

|        |                                                                   |           |
|--------|-------------------------------------------------------------------|-----------|
| 311420 | Fruit and vegetable canning, pickling, and drying                 | 3.626E-08 |
| 561500 | Travel arrangement and reservation services                       | 3.596E-08 |
| 424400 | Grocery and related product wholesalers                           | 3.483E-08 |
| 448000 | Clothing and clothing accessories stores                          | 3.388E-08 |
| 327993 | Mineral wool manufacturing                                        | 3.379E-08 |
| 335222 | Household refrigerator and home freezer manufacturing             | 3.345E-08 |
| 335210 | Small electrical appliance manufacturing                          | 3.320E-08 |
| 333316 | Photographic and photocopying equipment manufacturing             | 3.309E-08 |
| 327992 | Ground or treated mineral and earth manufacturing                 | 3.304E-08 |
| 111400 | Greenhouse, nursery, and floriculture production                  | 3.303E-08 |
| 311410 | Frozen food manufacturing                                         | 3.290E-08 |
| 339920 | Sporting and athletic goods manufacturing                         | 3.284E-08 |
| 541920 | Photographic services                                             | 3.259E-08 |
| 33329A | Other industrial machinery manufacturing                          | 3.256E-08 |
| 322230 | Stationery product manufacturing                                  | 3.231E-08 |
| 424A00 | Other nondurable goods merchant wholesalers                       | 3.227E-08 |
| 327910 | Abrasive product manufacturing                                    | 3.225E-08 |
| 331200 | Steel product manufacturing from purchased steel                  | 3.216E-08 |
| 33641A | Propulsion units and parts for space vehicles and guided missiles | 3.204E-08 |
| 621600 | Home health care services                                         | 3.184E-08 |
| 335911 | Storage battery manufacturing                                     | 3.175E-08 |
| 811100 | Automotive repair and maintenance                                 | 3.167E-08 |
| 323120 | Support activities for printing                                   | 3.061E-08 |
| 339940 | Office supplies (except paper) manufacturing                      | 3.056E-08 |
| 339950 | Sign manufacturing                                                | 3.020E-08 |
| 333920 | Material handling equipment manufacturing                         | 3.007E-08 |
| 33399B | Fluid power process machinery                                     | 2.994E-08 |
| 335991 | Carbon and graphite product manufacturing                         | 2.989E-08 |
| 33441A | Other electronic component manufacturing                          | 2.961E-08 |

---

---

|        |                                                                       |           |
|--------|-----------------------------------------------------------------------|-----------|
| 813B00 | Civic, social, professional, and similar organizations                | 2.958E-08 |
| 3118A0 | Cookie, cracker, pasta, and tortilla manufacturing                    | 2.955E-08 |
| 511110 | Newspaper publishers                                                  | 2.945E-08 |
| 323110 | Printing                                                              | 2.931E-08 |
| 31161A | Animal (except poultry) slaughtering, rendering, and processing       | 2.917E-08 |
| 113000 | Forestry and logging                                                  | 2.911E-08 |
| 33299A | Ammunition, arms, ordnance, and accessories manufacturing             | 2.894E-08 |
| 327200 | Glass and glass product manufacturing                                 | 2.888E-08 |
| 322299 | All other converted paper product manufacturing                       | 2.881E-08 |
| 327999 | Miscellaneous nonmetallic mineral products                            | 2.870E-08 |
| 326210 | Tire manufacturing                                                    | 2.859E-08 |
| 541400 | Specialized design services                                           | 2.842E-08 |
| 812100 | Personal care services                                                | 2.809E-08 |
| 311300 | Sugar and confectionery product manufacturing                         | 2.779E-08 |
| 5416A0 | Environmental and other technical consulting services                 | 2.777E-08 |
| 336111 | Automobile manufacturing                                              | 2.765E-08 |
| 332200 | Cutlery and handtool manufacturing                                    | 2.726E-08 |
| 31151A | Fluid milk and butter manufacturing                                   | 2.684E-08 |
| 711200 | Spectator sports                                                      | 2.681E-08 |
| 711A00 | Promoters of performing arts and sports and agents for public figures | 2.664E-08 |
| 333314 | Optical instrument and lens manufacturing                             | 2.653E-08 |
| 326290 | Other rubber product manufacturing                                    | 2.629E-08 |
| 325910 | Printing ink manufacturing                                            | 2.609E-08 |
| 21311A | Other support activities for mining                                   | 2.604E-08 |
| 212310 | Stone mining and quarrying                                            | 2.567E-08 |
| 532400 | Commercial and industrial machinery and equipment rental and leasing  | 2.549E-08 |
| 2123A0 | Other nonmetallic mineral mining and quarrying                        | 2.541E-08 |
| 454000 | Nonstore retailers                                                    | 2.529E-08 |
| 333613 | Mechanical power transmission equipment manufacturing                 | 2.524E-08 |

---

---

|        |                                                                                               |           |
|--------|-----------------------------------------------------------------------------------------------|-----------|
| 336360 | Motor vehicle seating and interior trim manufacturing                                         | 2.516E-08 |
| 335313 | Switchgear and switchboard apparatus manufacturing                                            | 2.479E-08 |
| 311513 | Cheese manufacturing                                                                          | 2.457E-08 |
| 326150 | Urethane and other foam product (except polystyrene) manufacturing                            | 2.436E-08 |
| 326110 | Plastics packaging materials and unlaminated film and sheet manufacturing                     | 2.432E-08 |
| 332119 | Metal crown, closure, and other metal stamping (except automotive)                            | 2.425E-08 |
| 326190 | Other plastics product manufacturing                                                          | 2.417E-08 |
| 561900 | Other support services                                                                        | 2.409E-08 |
| 336390 | Other Motor Vehicle Parts Manufacturing                                                       | 2.407E-08 |
| 311940 | Seasoning and dressing manufacturing                                                          | 2.382E-08 |
| 3363A0 | Motor vehicle steering, suspension component (except spring), and brake systems manufacturing | 2.369E-08 |
| 333414 | Heating equipment (except warm air furnaces) manufacturing                                    | 2.361E-08 |
| 333612 | Speed changer, industrial high-speed drive, and gear manufacturing                            | 2.341E-08 |
| 517A00 | Satellite, telecommunications resellers, and all other telecommunications                     | 2.340E-08 |
| 532100 | Automotive equipment rental and leasing                                                       | 2.321E-08 |
| 339910 | Jewelry and silverware manufacturing                                                          | 2.288E-08 |
| 336370 | Motor vehicle metal stamping                                                                  | 2.284E-08 |
| 335930 | Wiring device manufacturing                                                                   | 2.278E-08 |
| 339115 | Ophthalmic goods manufacturing                                                                | 2.269E-08 |
| 311210 | Flour milling and malt manufacturing                                                          | 2.242E-08 |
| 322220 | Paper Bag and Coated and Treated Paper Manufacturing                                          | 2.237E-08 |
| 814000 | Private households                                                                            | 2.218E-08 |
| 331313 | Alumina refining and primary aluminum production                                              | 2.139E-08 |
| 333111 | Farm machinery and equipment manufacturing                                                    | 2.137E-08 |
| 332410 | Power boiler and heat exchanger manufacturing                                                 | 2.127E-08 |
| 333112 | Lawn and garden equipment manufacturing                                                       | 2.122E-08 |
| 325120 | Industrial gas manufacturing                                                                  | 2.117E-08 |
| 339116 | Dental laboratories                                                                           | 2.097E-08 |
| 111200 | Vegetable and melon farming                                                                   | 2.088E-08 |

---

---

|        |                                                                                        |           |
|--------|----------------------------------------------------------------------------------------|-----------|
| 331490 | Nonferrous metal (except copper and aluminum) rolling, drawing, extruding and alloying | 2.079E-08 |
| 621200 | Offices of dentists                                                                    | 2.078E-08 |
| 333991 | Power-driven handtool manufacturing                                                    | 2.053E-08 |
| 112300 | Poultry and egg production                                                             | 2.043E-08 |
| 713200 | Gambling industries (except casino hotels)                                             | 2.024E-08 |
| 33291A | Valve and fittings other than plumbing                                                 | 2.016E-08 |
| 334290 | Other communications equipment manufacturing                                           | 2.014E-08 |
| 335221 | Household cooking appliance manufacturing                                              | 1.997E-08 |
| 311910 | Snack food manufacturing                                                               | 1.959E-08 |
| 324122 | Asphalt shingle and coating materials manufacturing                                    | 1.906E-08 |
| 332720 | Turned product and screw, nut, and bolt manufacturing                                  | 1.901E-08 |
| 423100 | Motor vehicle and motor vehicle parts and supplies                                     | 1.886E-08 |
| 325510 | Paint and coating manufacturing                                                        | 1.863E-08 |
| 3259A0 | All other chemical product and preparation manufacturing                               | 1.862E-08 |
| 333413 | Industrial and commercial fan and blower and air purification equipment manufacturing  | 1.854E-08 |
| 332991 | Ball and roller bearing manufacturing                                                  | 1.851E-08 |
| 336999 | All other transportation equipment manufacturing                                       | 1.837E-08 |
| 331420 | Copper rolling, drawing, extruding and alloying                                        | 1.833E-08 |
| 312130 | Wineries                                                                               | 1.822E-08 |
| 336320 | Motor vehicle electrical and electronic equipment manufacturing                        | 1.816E-08 |
| 325130 | Synthetic dye and pigment manufacturing                                                | 1.810E-08 |
| 423800 | Machinery, equipment, and supplies                                                     | 1.795E-08 |
| 33399A | Other general purpose machinery manufacturing                                          | 1.775E-08 |
| 327310 | Cement manufacturing                                                                   | 1.761E-08 |
| 423400 | Professional and commercial equipment and supplies                                     | 1.750E-08 |
| 322210 | Paperboard container manufacturing                                                     | 1.741E-08 |
| 333993 | Packaging machinery manufacturing                                                      | 1.738E-08 |
| 336991 | Motorcycle, bicycle, and parts manufacturing                                           | 1.730E-08 |
| 336350 | Motor vehicle transmission and power train parts manufacturing                         | 1.694E-08 |

---

---

|        |                                                                          |           |
|--------|--------------------------------------------------------------------------|-----------|
| 332500 | Hardware manufacturing                                                   | 1.673E-08 |
| 325610 | Soap and cleaning compound manufacturing                                 | 1.669E-08 |
| 331410 | Nonferrous Metal (except Aluminum) Smelting and Refining                 | 1.641E-08 |
| 333318 | Other commercial and service industry machinery manufacturing            | 1.636E-08 |
| 621100 | Offices of physicians                                                    | 1.609E-08 |
| 333120 | Construction machinery manufacturing                                     | 1.605E-08 |
| 313100 | Fiber, yarn, and thread mills                                            | 1.580E-08 |
| 325520 | Adhesive manufacturing                                                   | 1.574E-08 |
| 33391A | Pump and pumping equipment manufacturing                                 | 1.569E-08 |
| 221100 | Electric power generation, transmission, and distribution                | 1.529E-08 |
| 512100 | Motion picture and video industries                                      | 1.522E-08 |
| 311920 | Coffee and tea manufacturing                                             | 1.484E-08 |
| 336413 | Other aircraft parts and auxiliary equipment manufacturing               | 1.462E-08 |
| 515100 | Radio and television broadcasting                                        | 1.442E-08 |
| 335312 | Motor and generator manufacturing                                        | 1.432E-08 |
| 322110 | Pulp mills                                                               | 1.421E-08 |
| 336310 | Motor vehicle gasoline engine and engine parts manufacturing             | 1.420E-08 |
| 333912 | Air and gas compressor manufacturing                                     | 1.415E-08 |
| 314110 | Carpet and rug mills                                                     | 1.411E-08 |
| 332430 | Metal can, box, and other metal container (light gauge) manufacturing    | 1.404E-08 |
| 333130 | Mining and oil and gas field machinery manufacturing                     | 1.403E-08 |
| 336992 | Military armored vehicle, tank, and tank component manufacturing         | 1.400E-08 |
| 335999 | All other miscellaneous electrical equipment and component manufacturing | 1.399E-08 |
| 212100 | Coal mining                                                              | 1.378E-08 |
| 335314 | Relay and industrial control manufacturing                               | 1.374E-08 |
| 33451A | Watch, clock, and other measuring and controlling device manufacturing   | 1.365E-08 |
| 425000 | Wholesale electronic markets and agents and brokers                      | 1.360E-08 |
| 325310 | Fertilizer manufacturing                                                 | 1.357E-08 |
| 336500 | Railroad rolling stock manufacturing                                     | 1.344E-08 |

---

---

|        |                                                                                  |           |
|--------|----------------------------------------------------------------------------------|-----------|
| 541800 | Advertising, public relations, and related services                              | 1.335E-08 |
| 326160 | Plastics bottle manufacturing                                                    | 1.333E-08 |
| 325411 | Medicinal and botanical manufacturing                                            | 1.333E-08 |
| 213111 | Drilling oil and gas wells                                                       | 1.312E-08 |
| 322291 | Sanitary paper product manufacturing                                             | 1.288E-08 |
| 325180 | Other Basic Inorganic Chemical Manufacturing                                     | 1.282E-08 |
| 325620 | Toilet preparation manufacturing                                                 | 1.248E-08 |
| 311111 | Dog and cat food manufacturing                                                   | 1.243E-08 |
| 339112 | Surgical and medical instrument manufacturing                                    | 1.238E-08 |
| 333415 | Air conditioning, refrigeration, and warm air heating equipment manufacturing    | 1.232E-08 |
| 339113 | Surgical appliance and supplies manufacturing                                    | 1.193E-08 |
| 33131B | Aluminum product manufacturing from purchased aluminum                           | 1.187E-08 |
| 3252A0 | Synthetic rubber and artificial and synthetic fibers and filaments manufacturing | 1.186E-08 |
| 334513 | Industrial process variable instruments manufacturing                            | 1.185E-08 |
| 334514 | Totalizing fluid meter and counting device manufacturing                         | 1.184E-08 |
| 561200 | Facilities support services                                                      | 1.183E-08 |
| 611100 | Elementary and secondary schools                                                 | 1.163E-08 |
| 335920 | Communication and energy wire and cable manufacturing                            | 1.149E-08 |
| 311119 | Other animal food manufacturing                                                  | 1.143E-08 |
| 311700 | Seafood product preparation and packaging                                        | 1.138E-08 |
| 482000 | Rail transportation                                                              | 1.128E-08 |
| 811300 | Commercial and industrial machinery and equipment repair and maintenance         | 1.119E-08 |
| 511120 | Periodical Publishers                                                            | 1.062E-08 |
| 334515 | Electricity and signal testing instruments manufacturing                         | 1.050E-08 |
| 325413 | In-vitro diagnostic substance manufacturing                                      | 1.038E-08 |
| 423600 | Household appliances and electrical and electronic goods                         | 1.034E-08 |
| 334112 | Computer storage device manufacturing                                            | 1.032E-08 |
| 1111B0 | Grain farming                                                                    | 1.001E-08 |
| 311230 | Breakfast cereal manufacturing                                                   | 9.887E-09 |

---



---

|        |                                                                          |           |
|--------|--------------------------------------------------------------------------|-----------|
| 325320 | Pesticide and other agricultural chemical manufacturing                  | 9.689E-09 |
| 492000 | Couriers and messengers                                                  | 9.638E-09 |
| 2122A0 | Iron, gold, silver, and other metal ore mining                           | 9.623E-09 |
| 311930 | Flavoring syrup and concentrate manufacturing                            | 9.599E-09 |
| 622000 | Hospitals                                                                | 9.446E-09 |
| 324190 | Other petroleum and coal products manufacturing                          | 9.142E-09 |
| 511130 | Book publishers                                                          | 9.126E-09 |
| 334517 | Irradiation apparatus manufacturing                                      | 9.066E-09 |
| 334118 | Computer terminals and other computer peripheral equipment manufacturing | 8.710E-09 |
| 221200 | Natural gas distribution                                                 | 8.701E-09 |
| 711500 | Independent artists, writers, and performers                             | 8.694E-09 |
| 541300 | Architectural, engineering, and related services                         | 8.637E-09 |
| 334516 | Analytical laboratory instrument manufacturing                           | 8.451E-09 |
| 336411 | Aircraft manufacturing                                                   | 8.338E-09 |
| 325414 | Biological product (except diagnostic) manufacturing                     | 8.245E-09 |
| 334418 | Printed circuit assembly (electronic assembly) manufacturing             | 8.161E-09 |
| 333611 | Turbine and turbine generator set units manufacturing                    | 7.823E-09 |
| 312140 | Distilleries                                                             | 7.786E-09 |
| 5419A0 | All other miscellaneous professional, scientific, and technical services | 7.771E-09 |
| 1111A0 | Oilseed farming                                                          | 7.223E-09 |
| 322120 | Paper mills                                                              | 7.209E-09 |
| 525000 | Funds, trusts, and other financial vehicles                              | 7.203E-09 |
| 550000 | Management of companies and enterprises                                  | 7.135E-09 |
| 54151A | Other computer related services, including facilities management         | 6.808E-09 |
| 561300 | Employment services                                                      | 6.741E-09 |
| 333242 | Semiconductor machinery manufacturing                                    | 6.559E-09 |
| 311224 | Soybean and other oilseed processing                                     | 6.380E-09 |
| 424700 | Petroleum and petroleum products                                         | 6.372E-09 |
| 311225 | Fats and oils refining and blending                                      | 6.364E-09 |

---

---

|        |                                                                                            |           |
|--------|--------------------------------------------------------------------------------------------|-----------|
| 334210 | Telephone apparatus manufacturing                                                          | 6.298E-09 |
| 325412 | Pharmaceutical preparation manufacturing                                                   | 6.271E-09 |
| 336120 | Heavy duty truck manufacturing                                                             | 6.240E-09 |
| 324121 | Asphalt paving mixture and block manufacturing                                             | 6.237E-09 |
| 325211 | Plastics material and resin manufacturing                                                  | 6.084E-09 |
| 311221 | Wet corn milling                                                                           | 6.006E-09 |
| 1121A0 | Beef cattle ranching and farming, including feedlots and dual-purpose ranching and farming | 5.894E-09 |
| 541200 | Accounting, tax preparation, bookkeeping, and payroll services                             | 5.837E-09 |
| 561100 | Office administrative services                                                             | 5.819E-09 |
| 491000 | Postal service                                                                             | 5.690E-09 |
| 322130 | Paperboard mills                                                                           | 5.669E-09 |
| 336112 | Light truck and utility vehicle manufacturing                                              | 5.596E-09 |
| 333618 | Other engine equipment manufacturing                                                       | 5.425E-09 |
| 212230 | Copper, nickel, lead, and zinc mining                                                      | 5.287E-09 |
| 311514 | Dry, condensed, and evaporated dairy product manufacturing                                 | 5.152E-09 |
| 522A00 | Nondepository credit intermediation and related activities                                 | 5.114E-09 |
| 336412 | Aircraft engine and engine parts manufacturing                                             | 4.808E-09 |
| 541610 | Management consulting services                                                             | 4.760E-09 |
| 813100 | Religious organizations                                                                    | 4.731E-09 |
| 334413 | Semiconductor and related device manufacturing                                             | 4.698E-09 |
| 531HST | Tenant-occupied housing                                                                    | 4.402E-09 |
| 531ORE | Other real estate                                                                          | 4.279E-09 |
| 541511 | Custom computer programming services                                                       | 4.213E-09 |
| 524200 | Insurance agencies, brokerages, and related activities                                     | 4.159E-09 |
| 52A000 | Monetary authorities and depository credit intermediation                                  | 3.934E-09 |
| 611A00 | Junior colleges, colleges, universities, and professional schools                          | 3.892E-09 |
| 336414 | Guided missile and space vehicle manufacturing                                             | 3.830E-09 |
| 424200 | Drugs and druggists' sundries                                                              | 3.817E-09 |
| 519130 | Internet publishing and broadcasting and Web search portals                                | 3.783E-09 |

---

---

|        |                                                                 |           |
|--------|-----------------------------------------------------------------|-----------|
| 334220 | Broadcast and wireless communications equipment                 | 3.610E-09 |
| 523A00 | Securities and commodity contracts intermediation and brokerage | 3.575E-09 |
| 515200 | Cable and other subscription programming                        | 3.554E-09 |
| 334511 | Search, detection, and navigation instruments manufacturing     | 3.552E-09 |
| 325190 | Other basic organic chemical manufacturing                      | 3.466E-09 |
| 541700 | Scientific research and development services                    | 3.091E-09 |
| 541512 | Computer systems design services                                | 2.723E-09 |
| 523900 | Other financial investment activities                           | 2.611E-09 |
| 541100 | Legal services                                                  | 2.455E-09 |
| 518200 | Data processing, hosting, and related services                  | 2.437E-09 |
| 533000 | Lessors of nonfinancial intangible assets                       | 2.363E-09 |
| 312200 | Tobacco product manufacturing                                   | 2.160E-09 |
| 524113 | Direct life insurance carriers                                  | 1.714E-09 |
| 5241XX | Insurance carriers, except direct life                          | 1.638E-09 |
| 511200 | Software publishers                                             | 1.621E-09 |
| 517210 | Wireless telecommunications carriers (except satellite)         | 1.287E-09 |
| 325110 | Petrochemical manufacturing                                     | 1.276E-09 |
| 211000 | Oil and gas extraction                                          | 1.271E-09 |
| 331110 | Iron and steel mills and ferroalloy manufacturing               | 1.080E-09 |
| 517110 | Wired telecommunications carriers                               | 9.549E-10 |
| 324110 | Petroleum refineries                                            | 3.651E-10 |
| 4200ID | Customs duties                                                  | 0         |
| 531HSO | Owner-occupied housing                                          | 0         |
| S00500 | Federal general government (defense)                            | 0         |
| S00600 | Federal general government (nondefense)                         | 0         |
| S00102 | Other federal government enterprises                            | 0         |
| S00203 | Other state and local government enterprises                    | 0         |

---

\*Details about uncertainty (confidence interval) can be found on GitHub (<https://github.com/ZhehanHuang/Occupational-health-calculation/tree/main/uncertainty>)

**Section S5.2: Dataset of total characterization factors ( $CF_{total}$ ) for occupational health impacts**

**Table S11. Total characterization factors ( $CF_{total}$ ) for occupational health impacts (398 sectors) (Excel version available in [GitHub](#))**

| <b>EIO Code</b> | <b>Economic Sectors</b>                                                               | <b><math>CF_{total}</math><br/>(DALYs/\$)</b> | <b><math>CF_{SD}</math><br/>(DALYs/\$)</b> | <b><math>CF_{Sc}</math> (DALYs/\$)</b> |
|-----------------|---------------------------------------------------------------------------------------|-----------------------------------------------|--------------------------------------------|----------------------------------------|
| 621900          | Other ambulatory health care services                                                 | 2.980E-07                                     | 2.831E-07                                  | 1.490E-08                              |
| 624A00          | Community food, housing, and other relief services, including rehabilitation services | 2.925E-07                                     | 2.597E-07                                  | 3.281E-08                              |
| 713100          | Amusement parks and arcades                                                           | 2.337E-07                                     | 2.169E-07                                  | 1.676E-08                              |
| 327991          | Cut stone and stone product manufacturing                                             | 2.192E-07                                     | 1.862E-07                                  | 3.296E-08                              |
| 33712N          | Other household nonupholstered furniture                                              | 1.994E-07                                     | 1.641E-07                                  | 3.530E-08                              |
| 722110          | Full-service restaurants                                                              | 1.953E-07                                     | 1.768E-07                                  | 1.850E-08                              |
| 722211          | Limited-service restaurants                                                           | 1.952E-07                                     | 1.710E-07                                  | 2.418E-08                              |
| 624100          | Individual and family services                                                        | 1.833E-07                                     | 1.640E-07                                  | 1.936E-08                              |
| 623B00          | Residential mental health, substance abuse, and other residential care facilities     | 1.794E-07                                     | 1.622E-07                                  | 1.722E-08                              |
| 621300          | Offices of other health practitioners                                                 | 1.641E-07                                     | 1.543E-07                                  | 9.813E-09                              |
| 812300          | Dry-cleaning and laundry services                                                     | 1.635E-07                                     | 1.414E-07                                  | 2.211E-08                              |
| 3219A0          | All other wood product manufacturing                                                  | 1.550E-07                                     | 1.081E-07                                  | 4.690E-08                              |
| 561700          | Services to buildings and dwellings                                                   | 1.539E-07                                     | 1.368E-07                                  | 1.709E-08                              |
| 112120          | Dairy cattle and milk production                                                      | 1.515E-07                                     | 1.119E-07                                  | 3.958E-08                              |
| 115000          | Support activities for agriculture and forestry                                       | 1.512E-07                                     | 1.360E-07                                  | 1.517E-08                              |
| 621400          | Outpatient care centers                                                               | 1.504E-07                                     | 1.295E-07                                  | 2.086E-08                              |
| 331520          | Nonferrous metal foundries                                                            | 1.411E-07                                     | 1.111E-07                                  | 3.009E-08                              |
| 33721A          | Office furniture and custom architectural woodwork and millwork manufacturing         | 1.393E-07                                     | 9.829E-08                                  | 4.103E-08                              |
| 713900          | Other amusement and recreation industries                                             | 1.363E-07                                     | 1.157E-07                                  | 2.067E-08                              |
| 445000          | Food and beverage stores                                                              | 1.361E-07                                     | 1.178E-07                                  | 1.825E-08                              |
| 337110          | Wood kitchen cabinet and countertop manufacturing                                     | 1.356E-07                                     | 9.493E-08                                  | 4.068E-08                              |
| 721000          | Accommodation                                                                         | 1.338E-07                                     | 1.175E-07                                  | 1.635E-08                              |

|        |                                                            |           |           |           |
|--------|------------------------------------------------------------|-----------|-----------|-----------|
| 327390 | Other concrete product manufacturing                       | 1.303E-07 | 9.926E-08 | 3.105E-08 |
| 311513 | Cheese manufacturing                                       | 1.288E-07 | 2.616E-08 | 1.027E-07 |
| 321100 | Sawmills and wood preservation                             | 1.254E-07 | 7.313E-08 | 5.231E-08 |
| 337122 | Nonupholstered wood household furniture manufacturing      | 1.248E-07 | 8.172E-08 | 4.312E-08 |
| S00203 | Other state and local government enterprises               | 1.231E-07 | 9.456E-08 | 2.856E-08 |
| 541940 | Veterinary services                                        | 1.204E-07 | 1.088E-07 | 1.165E-08 |
| 337127 | Institutional furniture manufacturing                      | 1.191E-07 | 8.397E-08 | 3.516E-08 |
| 332420 | Metal tank (heavy gauge) manufacturing                     | 1.180E-07 | 8.929E-08 | 2.870E-08 |
| 337900 | Other furniture related product manufacturing              | 1.158E-07 | 7.074E-08 | 4.510E-08 |
| 447000 | Gasoline stations                                          | 1.153E-07 | 9.302E-08 | 2.227E-08 |
| 336212 | Truck trailer manufacturing                                | 1.153E-07 | 7.322E-08 | 4.204E-08 |
| 311520 | Ice cream and frozen dessert manufacturing                 | 1.150E-07 | 5.726E-08 | 5.770E-08 |
| 336213 | Motor home manufacturing                                   | 1.143E-07 | 7.717E-08 | 3.710E-08 |
| 321910 | Millwork                                                   | 1.140E-07 | 6.080E-08 | 5.323E-08 |
| 314120 | Curtain and linen mills                                    | 1.139E-07 | 7.550E-08 | 3.837E-08 |
| 336611 | Ship building and repairing                                | 1.136E-07 | 8.865E-08 | 2.491E-08 |
| 493000 | Warehousing and storage                                    | 1.132E-07 | 8.464E-08 | 2.858E-08 |
| 321200 | Veneer, plywood, and engineered wood product manufacturing | 1.124E-07 | 6.213E-08 | 5.030E-08 |
| 31151A | Fluid milk and butter manufacturing                        | 1.121E-07 | 2.703E-08 | 8.508E-08 |
| 331510 | Ferrous metal foundries                                    | 1.114E-07 | 9.053E-08 | 2.092E-08 |
| 611B00 | Other educational services                                 | 1.073E-07 | 9.001E-08 | 1.727E-08 |
| 336214 | Travel trailer and camper manufacturing                    | 1.063E-07 | 5.921E-08 | 4.705E-08 |
| 336211 | Motor vehicle body manufacturing                           | 1.055E-07 | 6.434E-08 | 4.117E-08 |
| 512200 | Sound recording industries                                 | 1.044E-07 | 9.374E-08 | 1.068E-08 |
| 337121 | Upholstered household furniture manufacturing              | 1.024E-07 | 5.767E-08 | 4.477E-08 |
| 332800 | Coating, engraving, heat treating and allied activities    | 1.024E-07 | 7.738E-08 | 2.504E-08 |
| 712000 | Museums, historical sites, zoos, and parks                 | 1.024E-07 | 8.672E-08 | 1.565E-08 |
| 311615 | Poultry processing                                         | 1.017E-07 | 4.594E-08 | 5.580E-08 |
| 316000 | Leather and allied product manufacturing                   | 1.016E-07 | 6.608E-08 | 3.548E-08 |

|        |                                                                                 |           |           |           |
|--------|---------------------------------------------------------------------------------|-----------|-----------|-----------|
| 311990 | All other food manufacturing                                                    | 1.004E-07 | 5.307E-08 | 4.733E-08 |
| 336612 | Boat building                                                                   | 9.945E-08 | 6.457E-08 | 3.488E-08 |
| 441000 | Motor vehicle and parts dealers                                                 | 9.942E-08 | 8.614E-08 | 1.327E-08 |
| 332310 | Plate work and fabricated structural product manufacturing                      | 9.905E-08 | 6.775E-08 | 3.130E-08 |
| 332913 | Plumbing fixture fitting and trim manufacturing                                 | 9.770E-08 | 6.241E-08 | 3.529E-08 |
| 311514 | Dry, condensed, and evaporated dairy product manufacturing                      | 9.765E-08 | 1.999E-08 | 7.765E-08 |
| 334300 | Audio and video equipment manufacturing                                         | 9.748E-08 | 7.429E-08 | 2.319E-08 |
| 485000 | Transit and ground passenger transportation                                     | 9.552E-08 | 7.877E-08 | 1.674E-08 |
| 621500 | Medical and diagnostic laboratories                                             | 9.550E-08 | 8.542E-08 | 1.009E-08 |
| 722A00 | All other food and drinking places                                              | 9.499E-08 | 8.011E-08 | 1.489E-08 |
| 327330 | Concrete pipe, brick, and block manufacturing                                   | 9.449E-08 | 6.080E-08 | 3.369E-08 |
| 332320 | Ornamental and architectural metal products manufacturing                       | 9.446E-08 | 6.679E-08 | 2.767E-08 |
| 327100 | Clay product and refractory manufacturing                                       | 9.289E-08 | 6.582E-08 | 2.707E-08 |
| 483000 | Water transportation                                                            | 9.270E-08 | 6.275E-08 | 2.994E-08 |
| 111900 | Other crop farming                                                              | 9.221E-08 | 6.127E-08 | 3.094E-08 |
| 5191A0 | News syndicates, libraries, archives and all other information services         | 9.084E-08 | 8.053E-08 | 1.031E-08 |
| 335224 | Household laundry equipment manufacturing                                       | 9.063E-08 | 6.130E-08 | 2.933E-08 |
| 48A000 | Scenic and sightseeing transportation and support activities for transportation | 9.052E-08 | 6.075E-08 | 2.977E-08 |
| 334610 | Manufacturing and reproducing magnetic and optical media                        | 8.990E-08 | 7.700E-08 | 1.290E-08 |
| 332114 | Custom roll forming                                                             | 8.958E-08 | 6.122E-08 | 2.836E-08 |
| 230302 | Residential maintenance and repair                                              | 8.721E-08 | 5.201E-08 | 3.520E-08 |
| 561600 | Investigation and security services                                             | 8.688E-08 | 7.319E-08 | 1.368E-08 |
| 114000 | Fishing, hunting and trapping                                                   | 8.529E-08 | 7.108E-08 | 1.421E-08 |
| 2332D0 | Other nonresidential structures                                                 | 8.521E-08 | 5.221E-08 | 3.300E-08 |
| 2334A0 | Other residential structures                                                    | 8.499E-08 | 5.203E-08 | 3.296E-08 |
| 230301 | Nonresidential maintenance and repair                                           | 8.492E-08 | 5.196E-08 | 3.296E-08 |
| 311810 | Bread and bakery product manufacturing                                          | 8.360E-08 | 5.205E-08 | 3.155E-08 |
| 327320 | Ready-mix concrete manufacturing                                                | 8.341E-08 | 5.181E-08 | 3.160E-08 |
| 339930 | Doll, toy, and game manufacturing                                               | 8.317E-08 | 6.137E-08 | 2.180E-08 |

|        |                                                                       |           |           |           |
|--------|-----------------------------------------------------------------------|-----------|-----------|-----------|
| 311410 | Frozen food manufacturing                                             | 8.310E-08 | 3.288E-08 | 5.022E-08 |
| 314900 | Other textile product mills                                           | 8.280E-08 | 4.980E-08 | 3.300E-08 |
| 315000 | Apparel manufacturing                                                 | 8.273E-08 | 5.939E-08 | 2.334E-08 |
| 332600 | Spring and wire product manufacturing                                 | 8.241E-08 | 5.110E-08 | 3.130E-08 |
| 313200 | Fabric mills                                                          | 8.227E-08 | 5.156E-08 | 3.070E-08 |
| 326140 | Polystyrene foam product manufacturing                                | 8.122E-08 | 5.234E-08 | 2.887E-08 |
| 111300 | Fruit and tree nut farming                                            | 8.104E-08 | 5.547E-08 | 2.557E-08 |
| 335110 | Electric lamp bulb and part manufacturing                             | 8.084E-08 | 5.731E-08 | 2.353E-08 |
| 444000 | Building material and garden equipment and supplies dealers           | 8.075E-08 | 6.865E-08 | 1.209E-08 |
| 311420 | Fruit and vegetable canning, pickling, and drying                     | 8.043E-08 | 3.109E-08 | 4.933E-08 |
| 532A00 | General and consumer goods rental                                     | 8.034E-08 | 6.564E-08 | 1.471E-08 |
| 511110 | Newspaper publishers                                                  | 7.992E-08 | 6.518E-08 | 1.474E-08 |
| 333514 | Special tool, die, jig, and fixture manufacturing                     | 7.990E-08 | 5.748E-08 | 2.242E-08 |
| 337215 | Showcase, partition, shelving, and locker manufacturing               | 7.966E-08 | 4.648E-08 | 3.318E-08 |
| 2332A0 | Office and commercial structures                                      | 7.952E-08 | 5.220E-08 | 2.732E-08 |
| 233230 | Manufacturing structures                                              | 7.830E-08 | 5.220E-08 | 2.610E-08 |
| 233210 | Health care structures                                                | 7.811E-08 | 5.220E-08 | 2.591E-08 |
| 332996 | Fabricated pipe and pipe fitting manufacturing                        | 7.809E-08 | 5.003E-08 | 2.805E-08 |
| 333517 | Machine tool manufacturing                                            | 7.795E-08 | 4.869E-08 | 2.925E-08 |
| 2332C0 | Transportation structures and highways and streets                    | 7.736E-08 | 5.220E-08 | 2.515E-08 |
| 233262 | Educational and vocational structures                                 | 7.735E-08 | 5.220E-08 | 2.515E-08 |
| 233411 | Single-family residential structures                                  | 7.734E-08 | 5.220E-08 | 2.514E-08 |
| 336360 | Motor vehicle seating and interior trim manufacturing                 | 7.627E-08 | 2.532E-08 | 5.095E-08 |
| 339990 | All other miscellaneous manufacturing                                 | 7.603E-08 | 4.984E-08 | 2.619E-08 |
| 31161A | Animal (except poultry) slaughtering, rendering, and processing       | 7.599E-08 | 2.936E-08 | 4.663E-08 |
| 335912 | Primary battery manufacturing                                         | 7.586E-08 | 4.975E-08 | 2.612E-08 |
| 312110 | Soft drink and ice manufacturing                                      | 7.478E-08 | 3.830E-08 | 3.648E-08 |
| 3118A0 | Cookie, cracker, pasta, and tortilla manufacturing                    | 7.468E-08 | 3.312E-08 | 4.156E-08 |
| 711A00 | Promoters of performing arts and sports and agents for public figures | 7.441E-08 | 5.679E-08 | 1.762E-08 |

|        |                                                                                                  |           |           |           |
|--------|--------------------------------------------------------------------------------------------------|-----------|-----------|-----------|
| 335228 | Other major household appliance manufacturing                                                    | 7.437E-08 | 5.082E-08 | 2.354E-08 |
| 326120 | Plastics pipe, pipe fitting, and unlaminated profile shape manufacturing                         | 7.214E-08 | 4.746E-08 | 2.467E-08 |
| 335311 | Power, distribution, and specialty transformer manufacturing                                     | 7.210E-08 | 4.626E-08 | 2.585E-08 |
| 332710 | Machine shops                                                                                    | 7.203E-08 | 4.583E-08 | 2.620E-08 |
| 327400 | Lime and gypsum product manufacturing                                                            | 7.157E-08 | 4.620E-08 | 2.537E-08 |
| 112300 | Poultry and egg production                                                                       | 7.126E-08 | 2.245E-08 | 4.881E-08 |
| 313300 | Textile and fabric finishing and fabric coating mills                                            | 7.121E-08 | 3.377E-08 | 3.744E-08 |
| 4B0000 | All other retail                                                                                 | 7.120E-08 | 5.605E-08 | 1.515E-08 |
| 811400 | Personal and household goods repair and maintenance                                              | 7.117E-08 | 5.942E-08 | 1.175E-08 |
| 336111 | Automobile manufacturing                                                                         | 7.069E-08 | 2.726E-08 | 4.343E-08 |
| 339950 | Sign manufacturing                                                                               | 7.057E-08 | 4.081E-08 | 2.976E-08 |
| 3363A0 | Motor vehicle steering, suspension component (except spring), and brake systems manufacturing    | 7.044E-08 | 2.393E-08 | 4.650E-08 |
| 233240 | Power and communication structures                                                               | 7.043E-08 | 5.220E-08 | 1.823E-08 |
| 33211A | All other forging, stamping, and sintering                                                       | 7.018E-08 | 3.731E-08 | 3.286E-08 |
| 311920 | Coffee and tea manufacturing                                                                     | 6.973E-08 | 1.634E-08 | 5.338E-08 |
| 326220 | Rubber and plastics hoses and belting manufacturing                                              | 6.958E-08 | 3.708E-08 | 3.250E-08 |
| 311940 | Seasoning and dressing manufacturing                                                             | 6.875E-08 | 2.428E-08 | 4.447E-08 |
| 311300 | Sugar and confectionery product manufacturing                                                    | 6.871E-08 | 2.689E-08 | 4.182E-08 |
| 33351B | Cutting and machine tool accessory, rolling mill, and other metalworking machinery manufacturing | 6.850E-08 | 4.271E-08 | 2.579E-08 |
| 312120 | Breweries                                                                                        | 6.845E-08 | 3.964E-08 | 2.881E-08 |
| 336350 | Motor vehicle transmission and power train parts manufacturing                                   | 6.827E-08 | 1.658E-08 | 5.169E-08 |
| 336310 | Motor vehicle gasoline engine and engine parts manufacturing                                     | 6.779E-08 | 1.566E-08 | 5.213E-08 |
| 326130 | Laminated plastics plate, sheet (except packaging), and shape manufacturing                      | 6.778E-08 | 4.091E-08 | 2.687E-08 |
| 334111 | Electronic computer manufacturing                                                                | 6.766E-08 | 6.113E-08 | 6.527E-09 |
| 336390 | Other Motor Vehicle Parts Manufacturing                                                          | 6.766E-08 | 2.521E-08 | 4.245E-08 |
| 333994 | Industrial process furnace and oven manufacturing                                                | 6.741E-08 | 4.041E-08 | 2.700E-08 |
| 311700 | Seafood product preparation and packaging                                                        | 6.738E-08 | 1.242E-08 | 5.496E-08 |
| 331490 | Nonferrous metal (except copper and aluminum) rolling, drawing, extruding and alloying           | 6.721E-08 | 3.385E-08 | 3.336E-08 |
| 452000 | General merchandise stores                                                                       | 6.712E-08 | 5.030E-08 | 1.683E-08 |



|        |                                                        |           |           |           |
|--------|--------------------------------------------------------|-----------|-----------|-----------|
| 334512 | Automatic environmental control manufacturing          | 6.688E-08 | 5.119E-08 | 1.569E-08 |
| 624400 | Child day care services                                | 6.680E-08 | 4.887E-08 | 1.793E-08 |
| 326210 | Tire manufacturing                                     | 6.679E-08 | 2.977E-08 | 3.702E-08 |
| 339920 | Sporting and athletic goods manufacturing              | 6.677E-08 | 3.404E-08 | 3.273E-08 |
| 335120 | Lighting fixture manufacturing                         | 6.673E-08 | 3.890E-08 | 2.782E-08 |
| 813A00 | Grantmaking, giving, and social advocacy organizations | 6.665E-08 | 5.258E-08 | 1.407E-08 |
| 5111A0 | Directory, mailing list, and other publishers          | 6.624E-08 | 4.846E-08 | 1.778E-08 |
| 311210 | Flour milling and malt manufacturing                   | 6.623E-08 | 2.330E-08 | 4.293E-08 |
| 113000 | Forestry and logging                                   | 6.603E-08 | 2.722E-08 | 3.881E-08 |
| 233412 | Multifamily residential structures                     | 6.599E-08 | 5.221E-08 | 1.378E-08 |
| 332999 | Other fabricated metal manufacturing                   | 6.547E-08 | 3.905E-08 | 2.642E-08 |
| 333112 | Lawn and garden equipment manufacturing                | 6.496E-08 | 2.210E-08 | 4.286E-08 |
| 327992 | Ground or treated mineral and earth manufacturing      | 6.471E-08 | 3.989E-08 | 2.482E-08 |
| 481000 | Air transportation                                     | 6.391E-08 | 4.141E-08 | 2.250E-08 |
| 33329A | Other industrial machinery manufacturing               | 6.377E-08 | 3.348E-08 | 3.029E-08 |
| S00102 | Other federal government enterprises                   | 6.280E-08 | 3.530E-08 | 2.750E-08 |
| 111400 | Greenhouse, nursery, and floriculture production       | 6.262E-08 | 3.492E-08 | 2.770E-08 |
| 326290 | Other rubber product manufacturing                     | 6.207E-08 | 2.855E-08 | 3.351E-08 |
| 322230 | Stationery product manufacturing                       | 6.193E-08 | 3.012E-08 | 3.181E-08 |
| 561400 | Business support services                              | 6.132E-08 | 4.446E-08 | 1.686E-08 |
| 333920 | Material handling equipment manufacturing              | 6.125E-08 | 3.044E-08 | 3.081E-08 |
| 339114 | Dental equipment and supplies manufacturing            | 6.114E-08 | 4.278E-08 | 1.836E-08 |
| 313100 | Fiber, yarn, and thread mills                          | 6.108E-08 | 2.365E-08 | 3.743E-08 |
| 484000 | Truck transportation                                   | 6.091E-08 | 3.898E-08 | 2.193E-08 |
| 515200 | Cable and other subscription programming               | 6.080E-08 | 4.302E-08 | 1.778E-08 |
| 333511 | Industrial mold manufacturing                          | 6.017E-08 | 3.479E-08 | 2.538E-08 |
| 331420 | Copper rolling, drawing, extruding and alloying        | 5.994E-08 | 1.961E-08 | 4.033E-08 |
| 327993 | Mineral wool manufacturing                             | 5.986E-08 | 3.461E-08 | 2.525E-08 |
| 423A00 | Other durable goods merchant wholesalers               | 5.986E-08 | 4.184E-08 | 1.801E-08 |

|        |                                                                    |           |           |           |
|--------|--------------------------------------------------------------------|-----------|-----------|-----------|
| 322299 | All other converted paper product manufacturing                    | 5.957E-08 | 2.744E-08 | 3.213E-08 |
| 112A00 | Animal production, except cattle and poultry and eggs              | 5.950E-08 | 3.959E-08 | 1.991E-08 |
| 212310 | Stone mining and quarrying                                         | 5.937E-08 | 3.900E-08 | 2.037E-08 |
| 336500 | Railroad rolling stock manufacturing                               | 5.910E-08 | 1.414E-08 | 4.496E-08 |
| 623A00 | Nursing and community care facilities                              | 5.879E-08 | 4.033E-08 | 1.846E-08 |
| 335222 | Household refrigerator and home freezer manufacturing              | 5.859E-08 | 3.384E-08 | 2.475E-08 |
| 335210 | Small electrical appliance manufacturing                           | 5.854E-08 | 3.348E-08 | 2.506E-08 |
| 333111 | Farm machinery and equipment manufacturing                         | 5.838E-08 | 2.129E-08 | 3.709E-08 |
| 486000 | Pipeline transportation                                            | 5.831E-08 | 4.475E-08 | 1.356E-08 |
| 327910 | Abrasive product manufacturing                                     | 5.778E-08 | 3.816E-08 | 1.962E-08 |
| 711100 | Performing arts companies                                          | 5.763E-08 | 4.273E-08 | 1.490E-08 |
| 812900 | Other personal services                                            | 5.741E-08 | 4.315E-08 | 1.426E-08 |
| 311910 | Snack food manufacturing                                           | 5.734E-08 | 1.913E-08 | 3.821E-08 |
| 336999 | All other transportation equipment manufacturing                   | 5.725E-08 | 1.899E-08 | 3.826E-08 |
| 323110 | Printing                                                           | 5.696E-08 | 3.232E-08 | 2.464E-08 |
| 327999 | Miscellaneous nonmetallic mineral products                         | 5.694E-08 | 3.125E-08 | 2.569E-08 |
| 327200 | Glass and glass product manufacturing                              | 5.655E-08 | 2.964E-08 | 2.691E-08 |
| 335911 | Storage battery manufacturing                                      | 5.648E-08 | 3.204E-08 | 2.445E-08 |
| 813B00 | Civic, social, professional, and similar organizations             | 5.636E-08 | 3.843E-08 | 1.793E-08 |
| 33299A | Ammunition, arms, ordnance, and accessories manufacturing          | 5.626E-08 | 2.992E-08 | 2.634E-08 |
| 322220 | Paper Bag and Coated and Treated Paper Manufacturing               | 5.605E-08 | 2.376E-08 | 3.229E-08 |
| 336370 | Motor vehicle metal stamping                                       | 5.574E-08 | 2.455E-08 | 3.119E-08 |
| 336320 | Motor vehicle electrical and electronic equipment manufacturing    | 5.556E-08 | 1.918E-08 | 3.638E-08 |
| 33399B | Fluid power process machinery                                      | 5.555E-08 | 2.903E-08 | 2.652E-08 |
| 333316 | Photographic and photocopying equipment manufacturing              | 5.552E-08 | 3.364E-08 | 2.188E-08 |
| 326190 | Other plastics product manufacturing                               | 5.536E-08 | 2.469E-08 | 3.067E-08 |
| 326150 | Urethane and other foam product (except polystyrene) manufacturing | 5.535E-08 | 2.530E-08 | 3.005E-08 |
| 331200 | Steel product manufacturing from purchased steel                   | 5.507E-08 | 2.608E-08 | 2.899E-08 |
| 561500 | Travel arrangement and reservation services                        | 5.501E-08 | 3.583E-08 | 1.918E-08 |

|        |                                                                                       |           |           |           |
|--------|---------------------------------------------------------------------------------------|-----------|-----------|-----------|
| 332119 | Metal crown, closure, and other metal stamping (except automotive)                    | 5.501E-08 | 2.635E-08 | 2.866E-08 |
| 339940 | Office supplies (except paper) manufacturing                                          | 5.464E-08 | 2.969E-08 | 2.495E-08 |
| 1111B0 | Grain farming                                                                         | 5.434E-08 | 1.127E-08 | 4.307E-08 |
| 312130 | Wineries                                                                              | 5.428E-08 | 1.844E-08 | 3.585E-08 |
| 111200 | Vegetable and melon farming                                                           | 5.419E-08 | 2.456E-08 | 2.963E-08 |
| 322110 | Pulp mills                                                                            | 5.390E-08 | 1.107E-08 | 4.284E-08 |
| 332410 | Power boiler and heat exchanger manufacturing                                         | 5.380E-08 | 2.371E-08 | 3.009E-08 |
| 424400 | Grocery and related product wholesalers                                               | 5.379E-08 | 3.421E-08 | 1.958E-08 |
| 336112 | Light truck and utility vehicle manufacturing                                         | 5.359E-08 | 5.547E-09 | 4.804E-08 |
| 333612 | Speed changer, industrial high-speed drive, and gear manufacturing                    | 5.348E-08 | 2.492E-08 | 2.856E-08 |
| 448000 | Clothing and clothing accessories stores                                              | 5.336E-08 | 3.528E-08 | 1.808E-08 |
| 325910 | Printing ink manufacturing                                                            | 5.315E-08 | 2.478E-08 | 2.837E-08 |
| 33291A | Valve and fittings other than plumbing                                                | 5.314E-08 | 2.272E-08 | 3.042E-08 |
| 311119 | Other animal food manufacturing                                                       | 5.299E-08 | 1.159E-08 | 4.140E-08 |
| 311111 | Dog and cat food manufacturing                                                        | 5.261E-08 | 1.446E-08 | 3.815E-08 |
| 322210 | Paperboard container manufacturing                                                    | 5.255E-08 | 1.800E-08 | 3.454E-08 |
| 561900 | Other support services                                                                | 5.244E-08 | 3.121E-08 | 2.124E-08 |
| 326110 | Plastics packaging materials and unlaminated film and sheet manufacturing             | 5.241E-08 | 2.384E-08 | 2.857E-08 |
| 335991 | Carbon and graphite product manufacturing                                             | 5.229E-08 | 3.012E-08 | 2.218E-08 |
| 335313 | Switchgear and switchboard apparatus manufacturing                                    | 5.224E-08 | 2.509E-08 | 2.715E-08 |
| 711200 | Spectator sports                                                                      | 5.202E-08 | 3.570E-08 | 1.632E-08 |
| 2123A0 | Other nonmetallic mineral mining and quarrying                                        | 5.198E-08 | 3.399E-08 | 1.799E-08 |
| 446000 | Health and personal care stores                                                       | 5.196E-08 | 3.890E-08 | 1.306E-08 |
| 333414 | Heating equipment (except warm air furnaces) manufacturing                            | 5.158E-08 | 2.504E-08 | 2.655E-08 |
| 332200 | Cutlery and handtool manufacturing                                                    | 5.158E-08 | 2.905E-08 | 2.253E-08 |
| 311230 | Breakfast cereal manufacturing                                                        | 5.144E-08 | 1.511E-08 | 3.633E-08 |
| 333613 | Mechanical power transmission equipment manufacturing                                 | 5.091E-08 | 2.495E-08 | 2.597E-08 |
| 333413 | Industrial and commercial fan and blower and air purification equipment manufacturing | 5.068E-08 | 1.956E-08 | 3.112E-08 |
| 314110 | Carpet and rug mills                                                                  | 5.045E-08 | 1.486E-08 | 3.559E-08 |

---

|        |                                                                       |           |           |           |
|--------|-----------------------------------------------------------------------|-----------|-----------|-----------|
| 333120 | Construction machinery manufacturing                                  | 5.030E-08 | 1.668E-08 | 3.362E-08 |
| 332720 | Turned product and screw, nut, and bolt manufacturing                 | 5.019E-08 | 2.021E-08 | 2.998E-08 |
| 332500 | Hardware manufacturing                                                | 5.011E-08 | 1.873E-08 | 3.139E-08 |
| 333618 | Other engine equipment manufacturing                                  | 5.007E-08 | 5.642E-09 | 4.443E-08 |
| 333991 | Power-driven handtool manufacturing                                   | 4.968E-08 | 2.116E-08 | 2.853E-08 |
| 335920 | Communication and energy wire and cable manufacturing                 | 4.931E-08 | 1.237E-08 | 3.694E-08 |
| 336120 | Heavy duty truck manufacturing                                        | 4.930E-08 | 5.870E-09 | 4.343E-08 |
| 334510 | Electromedical and electrotherapeutic apparatus manufacturing         | 4.920E-08 | 4.058E-08 | 8.618E-09 |
| 424A00 | Other nondurable goods merchant wholesalers                           | 4.907E-08 | 3.197E-08 | 1.710E-08 |
| 33399A | Other general purpose machinery manufacturing                         | 4.823E-08 | 1.913E-08 | 2.910E-08 |
| 332430 | Metal can, box, and other metal container (light gauge) manufacturing | 4.815E-08 | 1.513E-08 | 3.302E-08 |
| 33131B | Aluminum product manufacturing from purchased aluminum                | 4.750E-08 | 1.289E-08 | 3.461E-08 |
| 511120 | Periodical Publishers                                                 | 4.740E-08 | 3.237E-08 | 1.503E-08 |
| 322291 | Sanitary paper product manufacturing                                  | 4.692E-08 | 1.288E-08 | 3.404E-08 |
| 335930 | Wiring device manufacturing                                           | 4.690E-08 | 2.428E-08 | 2.262E-08 |
| 311225 | Fats and oils refining and blending                                   | 4.677E-08 | 6.572E-09 | 4.020E-08 |
| 33391A | Pump and pumping equipment manufacturing                              | 4.664E-08 | 1.621E-08 | 3.043E-08 |
| 812200 | Death care services                                                   | 4.663E-08 | 4.048E-08 | 6.144E-09 |
| 333130 | Mining and oil and gas field machinery manufacturing                  | 4.653E-08 | 1.477E-08 | 3.176E-08 |
| 541920 | Photographic services                                                 | 4.628E-08 | 3.131E-08 | 1.497E-08 |
| 325510 | Paint and coating manufacturing                                       | 4.627E-08 | 1.895E-08 | 2.732E-08 |
| 333912 | Air and gas compressor manufacturing                                  | 4.626E-08 | 1.495E-08 | 3.131E-08 |
| 335221 | Household cooking appliance manufacturing                             | 4.595E-08 | 1.952E-08 | 2.643E-08 |
| 33441A | Other electronic component manufacturing                              | 4.583E-08 | 2.878E-08 | 1.705E-08 |
| 323120 | Support activities for printing                                       | 4.526E-08 | 2.531E-08 | 1.995E-08 |
| 3259A0 | All other chemical product and preparation manufacturing              | 4.512E-08 | 1.972E-08 | 2.540E-08 |
| 811200 | Electronic and precision equipment repair and maintenance             | 4.496E-08 | 3.249E-08 | 1.246E-08 |
| 333314 | Optical instrument and lens manufacturing                             | 4.486E-08 | 2.503E-08 | 1.983E-08 |
| 327310 | Cement manufacturing                                                  | 4.476E-08 | 1.976E-08 | 2.500E-08 |

---

|        |                                                                                            |           |           |           |
|--------|--------------------------------------------------------------------------------------------|-----------|-----------|-----------|
| 333993 | Packaging machinery manufacturing                                                          | 4.454E-08 | 1.869E-08 | 2.585E-08 |
| 332991 | Ball and roller bearing manufacturing                                                      | 4.421E-08 | 1.929E-08 | 2.493E-08 |
| 322130 | Paperboard mills                                                                           | 4.363E-08 | 6.310E-09 | 3.732E-08 |
| 335312 | Motor and generator manufacturing                                                          | 4.325E-08 | 1.467E-08 | 2.858E-08 |
| 333318 | Other commercial and service industry machinery manufacturing                              | 4.309E-08 | 1.820E-08 | 2.488E-08 |
| 454000 | Nonstore retailers                                                                         | 4.291E-08 | 3.029E-08 | 1.262E-08 |
| 311224 | Soybean and other oilseed processing                                                       | 4.276E-08 | 7.136E-09 | 3.562E-08 |
| 322120 | Paper mills                                                                                | 4.256E-08 | 7.952E-09 | 3.461E-08 |
| 333415 | Air conditioning, refrigeration, and warm air heating equipment manufacturing              | 4.237E-08 | 1.387E-08 | 2.850E-08 |
| 325520 | Adhesive manufacturing                                                                     | 4.234E-08 | 1.662E-08 | 2.572E-08 |
| 326160 | Plastics bottle manufacturing                                                              | 4.230E-08 | 1.370E-08 | 2.860E-08 |
| 221300 | Water, sewage and other systems                                                            | 4.229E-08 | 1.673E-08 | 2.556E-08 |
| 311221 | Wet corn milling                                                                           | 4.225E-08 | 4.839E-09 | 3.741E-08 |
| 331313 | Alumina refining and primary aluminum production                                           | 4.217E-08 | 1.112E-08 | 3.105E-08 |
| 325610 | Soap and cleaning compound manufacturing                                                   | 4.128E-08 | 1.647E-08 | 2.481E-08 |
| 212100 | Coal mining                                                                                | 4.114E-08 | 2.439E-08 | 1.674E-08 |
| 335314 | Relay and industrial control manufacturing                                                 | 4.108E-08 | 1.463E-08 | 2.645E-08 |
| 336991 | Motorcycle, bicycle, and parts manufacturing                                               | 4.092E-08 | 1.745E-08 | 2.347E-08 |
| 812100 | Personal care services                                                                     | 4.077E-08 | 2.865E-08 | 1.212E-08 |
| 336992 | Military armored vehicle, tank, and tank component manufacturing                           | 4.063E-08 | 1.414E-08 | 2.649E-08 |
| 335999 | All other miscellaneous electrical equipment and component manufacturing                   | 4.059E-08 | 1.518E-08 | 2.541E-08 |
| 339116 | Dental laboratories                                                                        | 4.032E-08 | 2.313E-08 | 1.719E-08 |
| 1121A0 | Beef cattle ranching and farming, including feedlots and dual-purpose ranching and farming | 4.010E-08 | 7.344E-09 | 3.276E-08 |
| 311930 | Flavoring syrup and concentrate manufacturing                                              | 4.008E-08 | 1.186E-08 | 2.822E-08 |
| 339115 | Ophthalmic goods manufacturing                                                             | 4.002E-08 | 2.368E-08 | 1.634E-08 |
| 333611 | Turbine and turbine generator set units manufacturing                                      | 3.986E-08 | 7.587E-09 | 3.227E-08 |
| 325130 | Synthetic dye and pigment manufacturing                                                    | 3.945E-08 | 1.841E-08 | 2.104E-08 |
| 33641A | Propulsion units and parts for space vehicles and guided missiles                          | 3.932E-08 | 2.507E-08 | 1.425E-08 |
| 541400 | Specialized design services                                                                | 3.924E-08 | 2.911E-08 | 1.013E-08 |

|        |                                                                                  |           |           |           |
|--------|----------------------------------------------------------------------------------|-----------|-----------|-----------|
| 339910 | Jewelry and silverware manufacturing                                             | 3.910E-08 | 1.613E-08 | 2.297E-08 |
| 325310 | Fertilizer manufacturing                                                         | 3.898E-08 | 1.348E-08 | 2.550E-08 |
| 325120 | Industrial gas manufacturing                                                     | 3.893E-08 | 1.981E-08 | 1.913E-08 |
| 423100 | Motor vehicle and motor vehicle parts and supplies                               | 3.889E-08 | 2.051E-08 | 1.838E-08 |
| 324122 | Asphalt shingle and coating materials manufacturing                              | 3.888E-08 | 1.957E-08 | 1.932E-08 |
| 517A00 | Satellite, telecommunications resellers, and all other telecommunications        | 3.879E-08 | 2.369E-08 | 1.510E-08 |
| 5416A0 | Environmental and other technical consulting services                            | 3.841E-08 | 2.680E-08 | 1.160E-08 |
| 515100 | Radio and television broadcasting                                                | 3.793E-08 | 1.986E-08 | 1.807E-08 |
| 325620 | Toilet preparation manufacturing                                                 | 3.782E-08 | 1.647E-08 | 2.134E-08 |
| 621600 | Home health care services                                                        | 3.775E-08 | 2.557E-08 | 1.218E-08 |
| 331410 | Nonferrous Metal (except Aluminum) Smelting and Refining                         | 3.750E-08 | 9.398E-09 | 2.811E-08 |
| 811100 | Automotive repair and maintenance                                                | 3.714E-08 | 1.933E-08 | 1.782E-08 |
| 21311A | Other support activities for mining                                              | 3.645E-08 | 2.004E-08 | 1.641E-08 |
| 532400 | Commercial and industrial machinery and equipment rental and leasing             | 3.629E-08 | 1.865E-08 | 1.764E-08 |
| 423800 | Machinery, equipment, and supplies                                               | 3.607E-08 | 2.013E-08 | 1.593E-08 |
| 423400 | Professional and commercial equipment and supplies                               | 3.605E-08 | 2.291E-08 | 1.313E-08 |
| 336413 | Other aircraft parts and auxiliary equipment manufacturing                       | 3.554E-08 | 1.411E-08 | 2.143E-08 |
| 519130 | Internet publishing and broadcasting and Web search portals                      | 3.544E-08 | 1.765E-08 | 1.778E-08 |
| 325320 | Pesticide and other agricultural chemical manufacturing                          | 3.508E-08 | 9.864E-09 | 2.522E-08 |
| 334290 | Other communications equipment manufacturing                                     | 3.455E-08 | 2.147E-08 | 1.308E-08 |
| 3252A0 | Synthetic rubber and artificial and synthetic fibers and filaments manufacturing | 3.452E-08 | 9.165E-09 | 2.536E-08 |
| 2122A0 | Iron, gold, silver, and other metal ore mining                                   | 3.448E-08 | 1.349E-08 | 2.099E-08 |
| 339113 | Surgical appliance and supplies manufacturing                                    | 3.429E-08 | 1.412E-08 | 2.017E-08 |
| 621200 | Offices of dentists                                                              | 3.391E-08 | 2.103E-08 | 1.287E-08 |
| 1111A0 | Oilseed farming                                                                  | 3.375E-08 | 8.515E-09 | 2.523E-08 |
| 561200 | Facilities support services                                                      | 3.362E-08 | 1.188E-08 | 2.175E-08 |
| 813100 | Religious organizations                                                          | 3.360E-08 | 4.917E-09 | 2.869E-08 |
| 611A00 | Junior colleges, colleges, universities, and professional schools                | 3.330E-08 | 2.234E-08 | 1.097E-08 |
| 325180 | Other Basic Inorganic Chemical Manufacturing                                     | 3.314E-08 | 1.164E-08 | 2.151E-08 |

|        |                                                                          |           |           |           |
|--------|--------------------------------------------------------------------------|-----------|-----------|-----------|
| 325211 | Plastics material and resin manufacturing                                | 3.294E-08 | 8.050E-09 | 2.489E-08 |
| 325190 | Other basic organic chemical manufacturing                               | 3.286E-08 | 5.128E-09 | 2.773E-08 |
| 5310RE | Other real estate                                                        | 3.248E-08 | 4.193E-09 | 2.829E-08 |
| 333242 | Semiconductor machinery manufacturing                                    | 3.200E-08 | 7.171E-09 | 2.483E-08 |
| 334118 | Computer terminals and other computer peripheral equipment manufacturing | 3.153E-08 | 1.424E-08 | 1.730E-08 |
| 482000 | Rail transportation                                                      | 3.143E-08 | 1.206E-08 | 1.937E-08 |
| 621100 | Offices of physicians                                                    | 3.105E-08 | 1.663E-08 | 1.442E-08 |
| 312140 | Distilleries                                                             | 3.103E-08 | 6.548E-09 | 2.449E-08 |
| 492000 | Couriers and messengers                                                  | 3.076E-08 | 9.685E-09 | 2.108E-08 |
| 331110 | Iron and steel mills and ferroalloy manufacturing                        | 3.068E-08 | 1.955E-09 | 2.873E-08 |
| 713200 | Gambling industries (except casino hotels)                               | 3.050E-08 | 1.034E-08 | 2.016E-08 |
| 212230 | Copper, nickel, lead, and zinc mining                                    | 3.001E-08 | 1.164E-08 | 1.837E-08 |
| 512100 | Motion picture and video industries                                      | 2.965E-08 | 1.612E-08 | 1.353E-08 |
| 339112 | Surgical and medical instrument manufacturing                            | 2.965E-08 | 1.314E-08 | 1.651E-08 |
| 622000 | Hospitals                                                                | 2.931E-08 | 8.606E-09 | 2.070E-08 |
| 324121 | Asphalt paving mixture and block manufacturing                           | 2.927E-08 | 7.201E-09 | 2.207E-08 |
| 221100 | Electric power generation, transmission, and distribution                | 2.833E-08 | 1.341E-08 | 1.492E-08 |
| 532100 | Automotive equipment rental and leasing                                  | 2.807E-08 | 1.263E-08 | 1.544E-08 |
| 423600 | Household appliances and electrical and electronic goods                 | 2.738E-08 | 1.110E-08 | 1.628E-08 |
| 511130 | Book publishers                                                          | 2.714E-08 | 1.016E-08 | 1.699E-08 |
| 334418 | Printed circuit assembly (electronic assembly) manufacturing             | 2.677E-08 | 1.023E-08 | 1.654E-08 |
| 334515 | Electricity and signal testing instruments manufacturing                 | 2.669E-08 | 1.084E-08 | 1.585E-08 |
| 334517 | Irradiation apparatus manufacturing                                      | 2.662E-08 | 1.236E-08 | 1.426E-08 |
| 334513 | Industrial process variable instruments manufacturing                    | 2.660E-08 | 1.310E-08 | 1.351E-08 |
| 325411 | Medicinal and botanical manufacturing                                    | 2.643E-08 | 1.384E-08 | 1.259E-08 |
| 336411 | Aircraft manufacturing                                                   | 2.641E-08 | 9.172E-09 | 1.724E-08 |
| 491000 | Postal service                                                           | 2.639E-08 | 5.700E-09 | 2.069E-08 |
| 213111 | Drilling oil and gas wells                                               | 2.616E-08 | 1.175E-08 | 1.441E-08 |
| 334112 | Computer storage device manufacturing                                    | 2.481E-08 | 1.247E-08 | 1.234E-08 |

|        |                                                                          |           |           |           |
|--------|--------------------------------------------------------------------------|-----------|-----------|-----------|
| 324190 | Other petroleum and coal products manufacturing                          | 2.480E-08 | 6.194E-09 | 1.861E-08 |
| 518200 | Data processing, hosting, and related services                           | 2.447E-08 | 3.669E-09 | 2.080E-08 |
| 525000 | Funds, trusts, and other financial vehicles                              | 2.376E-08 | 6.042E-09 | 1.771E-08 |
| 541300 | Architectural, engineering, and related services                         | 2.341E-08 | 8.583E-09 | 1.483E-08 |
| 811300 | Commercial and industrial machinery and equipment repair and maintenance | 2.316E-08 | 7.046E-09 | 1.611E-08 |
| 611100 | Elementary and secondary schools                                         | 2.287E-08 | 1.178E-08 | 1.109E-08 |
| 336414 | Guided missile and space vehicle manufacturing                           | 2.280E-08 | 5.748E-09 | 1.705E-08 |
| 325413 | In-vitro diagnostic substance manufacturing                              | 2.267E-08 | 1.148E-08 | 1.119E-08 |
| 33451A | Watch, clock, and other measuring and controlling device manufacturing   | 2.251E-08 | 1.369E-08 | 8.823E-09 |
| 814000 | Private households                                                       | 2.218E-08 | 2.218E-08 | 0.000E+00 |
| 221200 | Natural gas distribution                                                 | 2.201E-08 | 8.454E-09 | 1.355E-08 |
| 541800 | Advertising, public relations, and related services                      | 2.187E-08 | 4.679E-09 | 1.719E-08 |
| 561100 | Office administrative services                                           | 2.171E-08 | 6.260E-09 | 1.545E-08 |
| 425000 | Wholesale electronic markets and agents and brokers                      | 2.033E-08 | 1.424E-08 | 6.088E-09 |
| 336412 | Aircraft engine and engine parts manufacturing                           | 2.032E-08 | 5.809E-09 | 1.451E-08 |
| 424200 | Drugs and druggists' sundries                                            | 1.974E-08 | 3.813E-09 | 1.593E-08 |
| 517210 | Wireless telecommunications carriers (except satellite)                  | 1.959E-08 | 2.354E-09 | 1.723E-08 |
| 334514 | Totalizing fluid meter and counting device manufacturing                 | 1.932E-08 | 1.223E-08 | 7.086E-09 |
| 5419A0 | All other miscellaneous professional, scientific, and technical services | 1.930E-08 | 7.776E-09 | 1.152E-08 |
| 522A00 | Nondepository credit intermediation and related activities               | 1.907E-08 | 8.238E-09 | 1.084E-08 |
| 334516 | Analytical laboratory instrument manufacturing                           | 1.878E-08 | 9.115E-09 | 9.661E-09 |
| 541610 | Management consulting services                                           | 1.864E-08 | 4.938E-09 | 1.370E-08 |
| 325110 | Petrochemical manufacturing                                              | 1.861E-08 | 1.530E-09 | 1.708E-08 |
| 54151A | Other computer related services, including facilities management         | 1.851E-08 | 4.911E-09 | 1.360E-08 |
| 325412 | Pharmaceutical preparation manufacturing                                 | 1.795E-08 | 7.154E-09 | 1.080E-08 |
| 550000 | Management of companies and enterprises                                  | 1.776E-08 | 7.254E-09 | 1.051E-08 |
| 523900 | Other financial investment activities                                    | 1.744E-08 | 2.310E-09 | 1.513E-08 |
| 711500 | Independent artists, writers, and performers                             | 1.739E-08 | 1.087E-08 | 6.515E-09 |
| 334210 | Telephone apparatus manufacturing                                        | 1.695E-08 | 8.372E-09 | 8.578E-09 |



|        |                                                                 |           |           |           |
|--------|-----------------------------------------------------------------|-----------|-----------|-----------|
| 541700 | Scientific research and development services                    | 1.680E-08 | 1.266E-09 | 1.553E-08 |
| 324110 | Petroleum refineries                                            | 1.659E-08 | 7.210E-10 | 1.587E-08 |
| 541512 | Computer systems design services                                | 1.643E-08 | 5.541E-09 | 1.089E-08 |
| 211000 | Oil and gas extraction                                          | 1.638E-08 | 4.834E-09 | 1.155E-08 |
| 325414 | Biological product (except diagnostic) manufacturing            | 1.566E-08 | 8.751E-09 | 6.912E-09 |
| 517110 | Wired telecommunications carriers                               | 1.566E-08 | 2.363E-09 | 1.330E-08 |
| 561300 | Employment services                                             | 1.516E-08 | 6.988E-09 | 8.175E-09 |
| 312200 | Tobacco product manufacturing                                   | 1.515E-08 | 2.390E-09 | 1.276E-08 |
| 533000 | Lessors of nonfinancial intangible assets                       | 1.513E-08 | 2.363E-09 | 1.277E-08 |
| 523A00 | Securities and commodity contracts intermediation and brokerage | 1.490E-08 | 4.390E-09 | 1.051E-08 |
| 511200 | Software publishers                                             | 1.485E-08 | 6.899E-09 | 7.950E-09 |
| 424700 | Petroleum and petroleum products                                | 1.484E-08 | 6.734E-09 | 8.103E-09 |
| 541200 | Accounting, tax preparation, bookkeeping, and payroll services  | 1.459E-08 | 5.920E-09 | 8.675E-09 |
| 334413 | Semiconductor and related device manufacturing                  | 1.435E-08 | 5.937E-09 | 8.409E-09 |
| 334220 | Broadcast and wireless communications equipment                 | 1.430E-08 | 5.277E-09 | 9.021E-09 |
| 52A000 | Monetary authorities and depository credit intermediation       | 1.416E-08 | 4.509E-09 | 9.653E-09 |
| 541511 | Custom computer programming services                            | 1.356E-08 | 3.210E-09 | 1.035E-08 |
| 541100 | Legal services                                                  | 1.344E-08 | 2.458E-09 | 1.098E-08 |
| S00500 | Federal general government (defense)                            | 1.300E-08 | 1.981E-10 | 1.280E-08 |
| 524200 | Insurance agencies, brokerages, and related activities          | 1.281E-08 | 3.999E-09 | 8.807E-09 |
| 334511 | Search, detection, and navigation instruments manufacturing     | 1.152E-08 | 4.395E-09 | 7.126E-09 |
| 5241XX | Insurance carriers, except direct life                          | 1.007E-08 | 1.681E-09 | 8.391E-09 |
| S00600 | Federal general government (nondefense)                         | 8.898E-09 | 3.086E-10 | 8.589E-09 |
| 531HST | Tenant-occupied housing                                         | 7.525E-09 | 5.962E-09 | 1.562E-09 |
| 524113 | Direct life insurance carriers                                  | 6.904E-09 | 1.862E-09 | 5.042E-09 |
| 531HSO | Owner-occupied housing                                          | 6.137E-09 | 2.828E-12 | 6.134E-09 |
| 4200ID | Customs duties                                                  | 0.000E+00 | 0.000E+00 | 0.000E+00 |

\*Details about uncertainty (confidence interval) can be found on GitHub (<https://github.com/ZhehanHuang/Occupational-health-calculation/tree/main/uncertainty>)

### **Section S5.3: Applicability of our approach to other countries**

In our study, all of the production processes and their supply chains were conducted within the United States. To test the method, we developed a more widely available globally, the relevant databases of workplace injuries in some developed countries were searched, and suggestions were provided based on their data characteristics and availability.

In our study, the developed CFs are estimated based on US nonfatal occupational data across industrial sectors and supply chains. For other developed countries, such as Canada and UK that have similar economic structures, productivity levels, and welfare systems<sup>16</sup>, we believe our CFs are reasonable proxies; however, our CFs may not be good proxies for developing countries (e.g., India). In addition, we also evaluated the applicability of our approach in other countries. To this end, we searched the occupational injury databases of other countries and discussed the potential applications of our approach based on their data characteristics and availability. We characterized the quality of occupational databases of other countries into three categories: 1) high; 2) medium; 3) low. For countries (e.g., Japan<sup>17</sup>, Australia<sup>18</sup>) with high-quality occupational databases, the injuries are reported by injury type and economic sectors as the US does. Therefore, our approach can be applied to those countries with the adjustment of duration and severity of reported injuries. For countries (e.g., countries in the European Union<sup>19</sup>, Canada<sup>20</sup>) with medium-quality of occupational injury databases, the injuries are reported by economic sectors, but only provide the number of total injuries without no information on different types of injuries. Our approach can still be applied to those countries but the developed CFs will be at a less granular level. For countries (e.g., Korea<sup>21</sup>, India) with low-quality occupational databases that do not disclose or lack publicly available statistics on worker

injuries, our approach cannot be applied due to data limitations. We have searched and summarized the occupational injury databases of other countries in Table S12.

**Table S12. Occupational data sources for other countries**

| Country      | Source                                                | Data Classification |                      | Website                                                                                                                                                                                                                                                                                                                                                             |
|--------------|-------------------------------------------------------|---------------------|----------------------|---------------------------------------------------------------------------------------------------------------------------------------------------------------------------------------------------------------------------------------------------------------------------------------------------------------------------------------------------------------------|
|              |                                                       | By Industry         | By Injury or Illness |                                                                                                                                                                                                                                                                                                                                                                     |
| Australia    | Safe Work Australia                                   | o                   | o                    | <a href="https://www.safeworkaustralia.gov.au/doc/key-work-health-and-safety-statistics-australia-2021">https://www.safeworkaustralia.gov.au/doc/key-work-health-and-safety-statistics-australia-2021</a>                                                                                                                                                           |
| Canada       | Employer's Annual Hazardous Occurrence Report (EAHOR) | o                   | x                    | <a href="https://www.canada.ca/en/employment-social-development/services/health-safety/reports/2020-injuries.html#h2.06">https://www.canada.ca/en/employment-social-development/services/health-safety/reports/2020-injuries.html#h2.06</a>                                                                                                                         |
| Europe Union | Eurostat                                              | o                   | x                    | <a href="https://ec.europa.eu/eurostat/databrowser/view/hsw_aw_nnasx/default/table?lang=en">https://ec.europa.eu/eurostat/databrowser/view/hsw_aw_nnasx/default/table?lang=en</a>                                                                                                                                                                                   |
| Finland      | National Board of Labour Protection                   | o                   | x                    | <a href="https://pxdata.stat.fi/PXWeb/pxweb/en/StatFin/StatFin__ttap/?tablelist=true">https://pxdata.stat.fi/PXWeb/pxweb/en/StatFin/StatFin__ttap/?tablelist=true</a>                                                                                                                                                                                               |
| Japan        | Japan Industrial Safety and Health Association        | o                   | o                    | <a href="https://www.jisha.or.jp/english/statistics/index.html">https://www.jisha.or.jp/english/statistics/index.html</a>                                                                                                                                                                                                                                           |
| Korea        | Korea Occupational Safety and Health Agency (KOSHA)   | -                   | -                    | <a href="https://kosha.or.kr/english/news/whatsNew.do?mode=view&amp;articleNo=55074&amp;article.offset=0&amp;articleLimit=10&amp;srSearchVal=injuries&amp;srSearchKey=article_title">https://kosha.or.kr/english/news/whatsNew.do?mode=view&amp;articleNo=55074&amp;article.offset=0&amp;articleLimit=10&amp;srSearchVal=injuries&amp;srSearchKey=article_title</a> |

Note: “o” represents data is available, while “x” represents data is not available.

## References

1. *Survey of Occupational Injuries and Illnesses Data*.  
<https://www.bls.gov/iif/nonfatal-injuries-and-illnesses-tables.htm> (accessed November 8).
2. Salomon, J. A.; Vos, T.; Hogan, D. R.; Gagnon, M.; Naghavi, M.; Mokdad, A.; Begum, N.; Shah, R.; Karyana, M.; Kosen, S.; Farje, M. R.; Moncada, G.; Dutta, A.; Sazawal, S.; Dyer, A.; Seiler, J.; Aboyans, V.; Baker, L.; Baxter, A.; Benjamin, E. J.; Bhalla, K.; Abdulkhak, A. B.; Blyth, F.; Bourne, R.; Braithwaite, T.; Brooks, P.; Brugha, T. S.; Bryan-Hancock, C.; Buchbinder, R.; Burney, P.; Calabria, B.; Chen, H.; Chugh, S. S.; Cooley, R.; Criqui, M. H.; Cross, M.; Dabhadkar, K. C.; Dahodwala, N.; Davis, A.; Degenhardt, L.; Díaz-Torné, C.; Dorsey, E. R.; Driscoll, T.; Edmond, K.; Elbaz, A.; Ezzati, M.; Feigin, V.; Ferri, C. P.; Flaxman, A. D.; Flood, L.; Fransen, M.; Fuse, K.; Gabbe, B. J.; Gillum, R. F.; Haagsma, J.; Harrison, J. E.; Havmoeller, R.; Hay, R. J.; Hel-Baquai, A.; Hoek, H. W.; Hoffman, H.; Hogeland, E.; Hoy, D.; Jarvis, D.; Jonas, J. B.; Karthikeyan, G.; Knowlton, L. M.; Lathlean, T.; Leasher, J. L.; Lim, S. S.; Lipshultz, S. E.; Lopez, A. D.; Lozano, R.; Lyons, R.; Malekzadeh, R.; Marcenes, W.; March, L.; Margolis, D. J.; McGill, N.; McGrath, J.; Mensah, G. A.; Meyer, A.-C.; Michaud, C.; Moran, A.; Mori, R.; Murdoch, M. E.; Naldi, L.; Newton, C. R.; Norman, R.; Omer, S. B.; Osborne, R.; Pearce, N.; Perez-Ruiz, F.; Perico, N.; Pesudovs, K.; Phillips, D.; Pourmalek, F.; Prince, M.; Rehm, J. T.; Remuzzi, G.; Richardson, K.; Room, R.; Saha, S.; Sampson, U.; Sanchez-Riera, L.; Segui-Gomez, M.; Shahraz, S.; Shibuya, K.; Singh, D.; Sliwa, K.; Smith, E.; Soerjomataram, I.; Steiner, T.; Stolk, W. A.; Stovner, L. J.; Sudfeld, C.; Taylor, H. R.; Tleyjeh, I. M.; van der Werf, M. J.; Watson, W. L.; Weatherall, D. J.; Weintraub, R.; Weisskopf, M. G.; Whiteford, H.; Wilkinson, J. D.; Woolf, A. D.; Zheng, Z.-J.; Murray, C. J. L., Common values in assessing health outcomes from disease and injury: disability weights measurement study for the Global Burden of Disease Study 2010. *The Lancet* **2012**, *380* (9859), 2129-2143.
3. Vos, T.; Flaxman, A. D.; Naghavi, M.; Lozano, R.; Michaud, C.; Ezzati, M.; Shibuya, K.; Salomon, J. A.; Abdalla, S.; Aboyans, V.; Abraham, J.; Ackerman, I.; Aggarwal, R.; Ahn, S. Y.; Ali, M. K.; AlMazroa, M. A.; Alvarado, M.; Anderson, H. R.; Anderson, L. M.; Andrews, K. G.; Atkinson, C.; Baddour, L. M.; Bahalim, A. N.; Barker-Collo, S.; Barrero, L. H.; Bartels, D. H.; Basáñez, M.-G.; Baxter, A.; Bell, M. L.; Benjamin, E. J.; Bennett, D.; Bernabé, E.; Bhalla, K.; Bhandari, B.; Bikbov, B.; Abdulkhak, A. B.; Birbeck, G.; Black, J. A.; Blencowe, H.; Blore, J. D.; Blyth, F.; Bolliger, I.; Bonaventure, A.; Boufous, S.; Bourne, R.; Boussinesq, M.; Braithwaite, T.; Brayne, C.; Bridgett, L.; Brooker, S.; Brooks, P.; Brugha, T. S.; Bryan-Hancock, C.; Bucello, C.; Buchbinder, R.; Buckle, G.; Budke, C. M.; Burch, M.; Burney, P.; Burstein, R.; Calabria, B.; Campbell, B.; Canter, C. E.; Carabin, H.; Carapetis, J.; Carmona, L.; Cella, C.; Charlson, F.; Chen, H.; Cheng, A. T.-A.; Chou, D.; Chugh, S. S.; Coffeng, L. E.; Colan, S. D.; Colquhoun, S.; Colson, K. E.; Condon, J.; Connor, M. D.; Cooper, L. T.; Corriere, M.; Cortinovis, M.; de Vaccaro, K. C.; Couser, W.; Cowie, B. C.; Criqui, M. H.; Cross, M.; Dabhadkar, K. C.; Dahiya, M.; Dahodwala, N.; Damsere-Derry, J.; Danaei, G.; Davis, A.; De Leo, D.; Degenhardt, L.; Dellavalle, R.; Delossantos, A.; Denenberg, J.; Derrett, S.; Des Jarlais, D. C.; Dharmaratne, S. D.; Dherani, M.; Diaz-Torne, C.; Dolk, H.; Dorsey, E. R.; Driscoll, T.; Duber, H.; Ebel, B.; Edmond, K.; Elbaz, A.; Ali, S. E.; Erskine, H.; Erwin, P. J.; Espindola, P.; Ewoigbokhan, S. E.; Farzadfar, F.; Feigin, V.; Felson, D. T.; Ferrari, A.; Ferri, C.

P.; Fèvre, E. M.; Finucane, M. M.; Flaxman, S.; Flood, L.; Foreman, K.; Forouzanfar, M. H.; Fowkes, F. G. R.; Franklin, R.; Fransen, M.; Freeman, M. K.; Gabbe, B. J.; Gabriel, S. E.; Gakidou, E.; Ganatra, H. A.; Garcia, B.; Gaspari, F.; Gillum, R. F.; Gmel, G.; Gosselin, R.; Grainger, R.; Groeger, J.; Guillemin, F.; Gunnell, D.; Gupta, R.; Haagsma, J.; Hagan, H.; Halasa, Y. A.; Hall, W.; Haring, D.; Haro, J. M.; Harrison, J. E.; Havmoeller, R.; Hay, R. J.; Higashi, H.; Hill, C.; Hoen, B.; Hoffman, H.; Hotez, P. J.; Hoy, D.; Huang, J. J.; Ibeanusi, S. E.; Jacobsen, K. H.; James, S. L.; Jarvis, D.; Jasrasaria, R.; Jayaraman, S.; Johns, N.; Jonas, J. B.; Karthikeyan, G.; Kassebaum, N.; Kawakami, N.; Keren, A.; Khoo, J.-P.; King, C. H.; Knowlton, L. M.; Kobusingye, O.; Koranteng, A.; Krishnamurthi, R.; Laloo, R.; Laslett, L. L.; Lathlean, T.; Leasher, J. L.; Lee, Y. Y.; Leigh, J.; Lim, S. S.; Limb, E.; Lin, J. K.; Lipnick, M.; Lipshultz, S. E.; Liu, W.; Loane, M.; Ohno, S. L.; Lyons, R.; Ma, J.; Mabweijano, J.; MacIntyre, M. F.; Malekzadeh, R.; Mallinger, L.; Manivannan, S.; Marcenes, W.; March, L.; Margolis, D. J.; Marks, G. B.; Marks, R.; Matsumori, A.; Matzopoulos, R.; Mayosi, B. M.; McAnulty, J. H.; McDermott, M. M.; McGill, N.; McGrath, J.; Medina-Mora, M. E.; Meltzer, M.; Memish, Z. A.; Mensah, G. A.; Merriman, T. R.; Meyer, A.-C.; Miglioli, V.; Miller, M.; Miller, T. R.; Mitchell, P. B.; Mocumbi, A. O.; Moffitt, T. E.; Mokdad, A. A.; Monasta, L.; Montico, M.; Moradi-Lakeh, M.; Moran, A.; Morawska, L.; Mori, R.; Murdoch, M. E.; Mwaniki, M. K.; Naidoo, K.; Nair, M. N.; Naldi, L.; Narayan, K. M. V.; Nelson, P. K.; Nelson, R. G.; Nevitt, M. C.; Newton, C. R.; Nolte, S.; Norman, P.; Norman, R.; O'Donnell, M.; O'Hanlon, S.; Olives, C.; Omer, S. B.; Ortblad, K.; Osborne, R.; Ozgediz, D.; Page, A.; Pahari, B.; Pandian, J. D.; Rivero, A. P.; Patten, S. B.; Pearce, N.; Padilla, R. P.; Perez-Ruiz, F.; Perico, N.; Pesudovs, K.; Phillips, D.; Phillips, M. R.; Pierce, K.; Pion, S.; Polanczyk, G. V.; Polinder, S.; Pope, C. A.; Popova, S.; Porrini, E.; Pourmalek, F.; Prince, M.; Pullan, R. L.; Ramaiah, K. D.; Ranganathan, D.; Razavi, H.; Regan, M.; Rehm, J. T.; Rein, D. B.; Remuzzi, G.; Richardson, K.; Rivara, F. P.; Roberts, T.; Robinson, C.; De León, F. R.; Ronfani, L.; Room, R.; Rosenfeld, L. C.; Rushton, L.; Sacco, R. L.; Saha, S.; Sampson, U.; Sanchez-Riera, L.; Sanman, E.; Schwebel, D. C.; Scott, J. G.; Segui-Gomez, M.; Shahraz, S.; Shepard, D. S.; Shin, H.; Shivakoti, R.; Silberberg, D.; Singh, D.; Singh, G. M.; Singh, J. A.; Singleton, J.; Sleet, D. A.; Sliwa, K.; Smith, E.; Smith, J. L.; Stapelberg, N. J. C.; Steer, A.; Steiner, T.; Stolk, W. A.; Stovner, L. J.; Sudfeld, C.; Syed, S.; Tamburlini, G.; Tavakkoli, M.; Taylor, H. R.; Taylor, J. A.; Taylor, W. J.; Thomas, B.; Thomson, W. M.; Thurston, G. D.; Tleyjeh, I. M.; Tonelli, M.; Towbin, J. A.; Truelsen, T.; Tsilimbaris, M. K.; Ubeda, C.; Undurraga, E. A.; van der Werf, M. J.; van Os, J.; Vavilala, M. S.; Venketasubramanian, N.; Wang, M.; Wang, W.; Watt, K.; Weatherall, D. J.; Weinstock, M. A.; Weintraub, R.; Weisskopf, M. G.; Weissman, M. M.; White, R. A.; Whiteford, H.; Wiersma, S. T.; Wilkinson, J. D.; Williams, H. C.; Williams, S. R. M.; Witt, E.; Wolfe, F.; Woolf, A. D.; Wulf, S.; Yeh, P.-H.; Zaidi, A. K. M.; Zheng, Z.-J.; Zonies, D.; Lopez, A. D.; Murray, C. J. L., Years lived with disability (YLDs) for 1160 sequelae of 289 diseases and injuries 1990–2010: a systematic analysis for the Global Burden of Disease Study 2010. *The Lancet* **2012**, *380* (9859), 2163-2196.

4. Murray, C. J.; Lopez, A. D., Global and regional descriptive epidemiology of disability: incidence, prevalence, health expectancies and years lived with disability. *The global burden of disease* **1996**, *1*, 201-246.

5. Chen, S.; Guo, L.; Wang, Z.; Mao, W.; Ge, Y.; Ying, X.; Fang, J.; Long, Q.; Liu, Q.; Xiang, H.; Wu, C.; Fu, C.; Dong, D.; Zhang, J.; Sue, J.; Tian, L.;

- Wang, L.; Zhou, M.; Zhang, M.; Qian, M.; Liu, W.; Jiang, W.; Feng, W.; Zeng, X.; Ding, X.; Lei, X.; Tolhurst, R.; Xu, L.; Wang, H.; Ziegeweid, F.; Glenn, S.; Ji, J. S.; Story, M.; Yamey, G.; Tang, S., Current situation and progress toward the 2030 health-related Sustainable Development Goals in China: A systematic analysis. *Plos Medicine* **2019**, *16* (11).
6. Salomon, J. A.; Haagsma, J. A.; Davis, A.; de Noordhout, C. M.; Polinder, S.; Havelaar, A. H.; Cassini, A.; Devleeschauwer, B.; Kretzschmar, M.; Speybroeck, N.; Murray, C. J. L.; Vos, T., Disability weights for the Global Burden of Disease 2013 study. *The Lancet Global Health* **2015**, *3* (11), e712-e723.
7. *Global Burden of Disease Study 2017 (GBD 2017) Data Resources*. <https://ghdx.healthdata.org/gbd-2017> (accessed December 12).
8. Ingwersen, W. W.; Li, M.; Young, B.; Vendries, J.; Birney, C., USEEIO v2.0, The US Environmentally-Extended Input-Output Model v2.0. *Scientific Data* **2022**, *9* (1), 194.
9. Leigh, J. P.; Marcin, J. P.; Miller, T. R., An estimate of the US Government's undercount of nonfatal occupational injuries. *Journal of Occupational and Environmental Medicine* **2004**, 10-18.
10. Scanlon, K. A.; Gray, G. M.; Francis, R. A.; Lloyd, S. M.; LaPuma, P., The work environment disability-adjusted life year for use with life cycle assessment: a methodological approach. *Environmental Health* **2013**, *12* (1), 21.
11. Rui, X.; Yuanyuan, Z.; Liming, C., Structural path analysis and its applications: literature review. *National Accounting Review* **2020**, *2* (1), 83-94.
12. Smith, S. L. J., How Big, How Many? Enterprise Size Distributions in Tourism and Other Industries. *Journal of Travel Research* **2006**, *45* (1), 53-58.
13. Kijko, G.; Jolliet, O.; Margni, M., Occupational Health Impacts Due to Exposure to Organic Chemicals over an Entire Product Life Cycle. *Environmental Science & Technology* **2016**, *50* (23), 13105-13114.
14. Vos, T.; Lim, S. S.; Abbafati, C.; Abbas, K. M.; Abbasi, M.; Abbasifard, M.; Abbasi-Kangevari, M.; Abbastabar, H.; Abd-Allah, F.; Abdelalim, A.; Abdollahi, M.; Abdollahpour, I.; Abolhassani, H.; Aboyans, V.; Abrams, E. M.; Abreu, L. G.; Abrigo, M. R. M.; Abu-Raddad, L. J.; Abushouk, A. I.; Acebedo, A.; Ackerman, I. N.; Adabi, M.; Adamu, A. A.; Adebayo, O. M.; Adekanmbi, V.; Adelson, J. D.; Adetokunboh, O. O.; Adham, D.; Afshari, M.; Afshin, A.; Agardh, E. E.; Agarwal, G.; Agesa, K. M.; Aghaali, M.; Aghamir, S. M. K.; Agrawal, A.; Ahmad, T.; Ahmadi, A.; Ahmadi, M.; Ahmadi, H.; Ahmadpour, E.; Akalu, T. Y.; Akinyemi, R. O.; Akinyemiju, T.; Akombi, B.; Al-Aly, Z.; Alam, K.; Alam, N.; Alam, S.; Alam, T.; Alanzi, T. M.; Albertson, S. B.; Alcalde-Rabanal, J. E.; Alema, N. M.; Ali, M.; Ali, S.; Alicandro, G.; Alijanzadeh, M.; Alinia, C.; Alipour, V.; Aljunid, S. M.; Alla, F.; Allebeck, P.; Almasi-Hashiani, A.; Alonso, J.; Al-Raddadi, R. M.; Altirkawi, K. A.; Alvis-Guzman, N.; Alvis-Zakzuk, N. J.; Amini, S.; Amini-Rarani, M.; Aminorroaya, A.; Amiri, F.; Amit, A. M. L.; Amugsi, D. A.; Amul, G. G. H.; Anderlini, D.; Andrei, C. L.; Andrei, T.; Anjomshoa, M.; Ansari, F.; Ansari, I.; Ansari-Moghaddam, A.; Antonio, C. A. T.; Antony, C. M.; Antriyandarti, E.; Anvari, D.; Anwer, R.; Arabloo, J.; Arab-Zozani, M.; Aravkin, A. Y.; Ariani, F.; Ärnlöv, J.; Aryal, K. K.; Arzani, A.; Asadi-Aliabadi, M.; Asadi-Pooya, A. A.; Asghari, B.; Ashbaugh, C.; Atnafu, D. D.; Atre, S. R.; Ausloos, F.; Ausloos, M.; Ayala Quintanilla, B. P.; Ayano, G.; Ayanore, M. A.; Aynalem, Y. A.; Azari, S.; Azarian, G.; Azene, Z. N.; Babae, E.; Badawi, A.; Bagherzadeh, M.; Bakhshaei, M. H.; Bakhtiari, A.; Balakrishnan, S.; Balalla, S.; Balassyano, S.; Banach, M.; Banik, P. C.; Bannick, M. S.; Bante, A. B.; Baraki, A.

G.; Barboza, M. A.; Barker-Collo, S. L.; Barthelemy, C. M.; Barua, L.; Barzegar, A.; Basu, S.; Baune, B. T.; Bayati, M.; Bazmandegan, G.; Bedi, N.; Beghi, E.; Béjot, Y.; Bello, A. K.; Bender, R. G.; Bennett, D. A.; Bennitt, F. B.; Bensenor, I. M.; Benziger, C. P.; Berhe, K.; Bernabe, E.; Bertolacci, G. J.; Bhageerathy, R.; Bhala, N.; Bhandari, D.; Bhardwaj, P.; Bhattacharyya, K.; Bhutta, Z. A.; Bibi, S.; Biehl, M. H.; Bikbov, B.; Bin Sayeed, M. S.; Biondi, A.; Birihane, B. M.; Bisanzio, D.; Bisignano, C.; Biswas, R. K.; Bohlouli, S.; Bohluli, M.; Bolla, S. R. R.; Boloor, A.; Boon-Dooley, A. S.; Borges, G.; Borzi, A. M.; Bourne, R.; Brady, O. J.; Brauer, M.; Brayne, C.; Breitborde, N. J. K.; Brenner, H.; Briant, P. S.; Briggs, A. M.; Briko, N. I.; Britton, G. B.; Bryazka, D.; Buchbinder, R.; Bumgarner, B. R.; Busse, R.; Butt, Z. A.; Caetano dos Santos, F. L.; Cámara, L. L. A. A.; Campos-Nonato, I. R.; Car, J.; Cárdenas, R.; Carreras, G.; Carrero, J. J.; Carvalho, F.; Castaldelli-Maia, J. M.; Castañeda-Orjuela, C. A.; Castelpietra, G.; Castle, C. D.; Castro, F.; Catalá-López, F.; Causey, K.; Cederroth, C. R.; Cercy, K. M.; Cerin, E.; Chandan, J. S.; Chang, A. R.; Charlson, F. J.; Chattu, V. K.; Chaturvedi, S.; Chimed-Ochir, O.; Chin, K. L.; Cho, D. Y.; Christensen, H.; Chu, D.-T.; Chung, M. T.; Cicuttini, F. M.; Ciobanu, L. G.; Cirillo, M.; Collins, E. L.; Compton, K.; Conti, S.; Cortesi, P. A.; Costa, V. M.; Cousin, E.; Cowden, R. G.; Cowie, B. C.; Cromwell, E. A.; Cross, D. H.; Crowe, C. S.; Cruz, J. A.; Cunningham, M.; Dahlawi, S. M. A.; Damiani, G.; Dandona, L.; Dandona, R.; Darwesh, A. M.; Daryani, A.; Das, J. K.; Das Gupta, R.; das Neves, J.; Dávila-Cervantes, C. A.; Davletov, K.; De Leo, D.; Dean, F. E.; DeCleene, N. K.; Deen, A.; Degenhardt, L.; Dellavalle, R. P.; Demeke, F. M.; Demsie, D. G.; Denova-Gutiérrez, E.; Dereje, N. D.; Dervenis, N.; Desai, R.; Desalew, A.; Dessie, G. A.; Dharmaratne, S. D.; Dhungana, G. P.; Dianatinasab, M.; Diaz, D.; Dibaji Forooshani, Z. S.; Dingels, Z. V.; Dirac, M. A.; Djalalinia, S.; Do, H. T.; Dokova, K.; Dorostkar, F.; Doshi, C. P.; Doshmangir, L.; Douiri, A.; Doxey, M. C.; Driscoll, T. R.; Dunachie, S. J.; Duncan, B. B.; Duraes, A. R.; Eagan, A. W.; Ebrahimi Kalan, M.; Edvardsson, D.; Ehrlich, J. R.; El Nahas, N.; El Sayed, I.; El Tantawi, M.; Elbarazi, I.; Elgendy, I. Y.; Elhabashy, H. R.; El-Jaafary, S. I.; Elyazar, I. R. F.; Emamian, M. H.; Emmons-Bell, S.; Erskine, H. E.; Eshрати, B.; Eskandarieh, S.; Esmaeilnejad, S.; Esmaeilzadeh, F.; Esteghamati, A.; Estep, K.; Etemadi, A.; Etilso, A. E.; Farahmand, M.; Faraj, A.; Fareed, M.; Faridnia, R.; Farinha, C. S. e. S.; Farioli, A.; Faro, A.; Faruque, M.; Farzadfar, F.; Fattahi, N.; Fazlzadeh, M.; Feigin, V. L.; Feldman, R.; Fereshtehnejad, S.-M.; Fernandes, E.; Ferrari, A. J.; Ferreira, M. L.; Filip, I.; Fischer, F.; Fisher, J. L.; Fitzgerald, R.; Flohr, C.; Flor, L. S.; Foigt, N. A.; Folleyan, M. O.; Force, L. M.; Fornari, C.; Foroutan, M.; Fox, J. T.; Freitas, M.; Fu, W.; Fukumoto, T.; Furtado, J. M.; Gad, M. M.; Gakidou, E.; Galles, N. C.; Gallus, S.; Gamkrelidze, A.; Garcia-Basteiro, A. L.; Gardner, W. M.; Geberemariam, B. S.; Gebrehiwot, A. M.; Gebremedhin, K. B.; Gebreslassie, A. A. A.; Gershberg Hayoon, A.; Gething, P. W.; Ghadimi, M.; Ghadiri, K.; Ghafourifard, M.; Ghajar, A.; Ghamari, F.; Ghashghaee, A.; Ghasvand, H.; Ghith, N.; Gholamian, A.; Gilani, S. A.; Gill, P. S.; Gitimoghaddam, M.; Giussani, G.; Goli, S.; Gomez, R. S.; Gopalani, S. V.; Gorini, G.; Gorman, T. M.; Gottlich, H. C.; Goudarzi, H.; Goulart, A. C.; Goulart, B. N. G.; Grada, A.; Grivna, M.; Grosso, G.; Gubari, M. I. M.; Gughani, H. C.; Guimaraes, A. L. S.; Guimaraes, R. A.; Guled, R. A.; Guo, G.; Guo, Y.; Gupta, R.; Haagsma, J. A.; Haddock, B.; Hafezi-Nejad, N.; Hafiz, A.; Hagins, H.; Haile, L. M.; Hall, B. J.; Halvaei, I.; Hamadeh, R. R.; Hamagharib Abdullah, K.; Hamilton, E. B.; Han, C.; Han, H.; Hankey, G. J.; Haro, J. M.; Harvey, J. D.; Hasaballah, A.

I.; Hasanzadeh, A.; Hashemian, M.; Hassanipour, S.; Hassankhani, H.; Havmoeller, R. J.; Hay, R. J.; Hay, S. I.; Hayat, K.; Heidari, B.; Heidari, G.; Heidari-Soureshjani, R.; Hendrie, D.; Henrikson, H. J.; Henry, N. J.; Herteliu, C.; Heydarpour, F.; Hird, T. R.; Hoek, H. W.; Hole, M. K.; Holla, R.; Hoogar, P.; Hosgood, H. D.; Hosseinzadeh, M.; Hostiuc, M.; Hostiuc, S.; Househ, M.; Hoy, D. G.; Hsairi, M.; Hsieh, V. C.-r.; Hu, G.; Huda, T. M.; Hugo, F. N.; Huynh, C. K.; Hwang, B.-F.; Iannucci, V. C.; Ibitoye, S. E.; Ikuta, K. S.; Ilesanmi, O. S.; Ilic, I. M.; Ilic, M. D.; Inbaraj, L. R.; Ippolito, H.; Irvani, S. S. N.; Islam, M. M.; Islam, M.; Islam, S. M. S.; Islami, F.; Iso, H.; Ivers, R. Q.; Iwu, C. C. D.; Iyamu, I. O.; Jaafari, J.; Jacobsen, K. H.; Jadidi-Niaragh, F.; Jafari, H.; Jafarina, M.; Jahagirdar, D.; Jahani, M. A.; Jahanmehr, N.; Jakovljevic, M.; Jalali, A.; Jalilian, F.; James, S. L.; Janjani, H.; Janodia, M. D.; Jayatilleke, A. U.; Jeemon, P.; Jenabi, E.; Jha, R. P.; Jha, V.; Ji, J. S.; Jia, P.; John, O.; John-Akinola, Y. O.; Johnson, C. O.; Johnson, S. C.; Jonas, J. B.; Joo, T.; Joshi, A.; Jozwiak, J. J.; Jürisson, M.; Kabir, A.; Kabir, Z.; Kalani, H.; Kalani, R.; Kalankesh, L. R.; Kalhor, R.; Kamiab, Z.; Kanchan, T.; Karami Matin, B.; Karch, A.; Karim, M. A.; Karimi, S. E.; Kassa, G. M.; Kassebaum, N. J.; Katikireddi, S. V.; Kawakami, N.; Kayode, G. A.; Keddie, S. H.; Keller, C.; Kereselidze, M.; Khafaie, M. A.; Khalid, N.; Khan, M.; Khatab, K.; Khater, M. M.; Khatib, M. N.; Khayamzadeh, M.; Khodayari, M. T.; Khundkar, R.; Kianipour, N.; Kieling, C.; Kim, D.; Kim, Y.-E.; Kim, Y. J.; Kimokoti, R. W.; Kisa, A.; Kisa, S.; Kissimova-Skarbek, K.; Kivimäki, M.; Kneib, C. J.; Knudsen, A. K. S.; Kocarnik, J. M.; Kolola, T.; Kopec, J. A.; Kosen, S.; Koul, P. A.; Koyanagi, A.; Kravchenko, M. A.; Krishan, K.; Krohn, K. J.; Kuate Defo, B.; Kucuk Bicer, B.; Kumar, G. A.; Kumar, M.; Kumar, P.; Kumar, V.; Kumares, G.; Kurmi, O. P.; Kusuma, D.; Kyu, H. H.; La Vecchia, C.; Lacey, B.; Lal, D. K.; Laloo, R.; Lam, J. O.; Lami, F. H.; Landires, I.; Lang, J. J.; Lansingh, V. C.; Larson, S. L.; Larsson, A. O.; Lasrado, S.; Lassi, Z. S.; Lau, K. M.-M.; Lavados, P. M.; Lazarus, J. V.; Ledesma, J. R.; Lee, P. H.; Lee, S. W. H.; LeGrand, K. E.; Leigh, J.; Leonardi, M.; Lescinsky, H.; Leung, J.; Levi, M.; Lewington, S.; Li, S.; Lim, L.-L.; Lin, C.; Lin, R.-T.; Linehan, C.; Linn, S.; Liu, H.-C.; Liu, S.; Liu, Z.; Looker, K. J.; Lopez, A. D.; Lopukhov, P. D.; Lorkowski, S.; Lotufo, P. A.; Lucas, T. C. D.; Lugo, A.; Lunevicius, R.; Lyons, R. A.; Ma, J.; MacLachlan, J. H.; Maddison, E. R.; Maddison, R.; Madotto, F.; Mahasha, P. W.; Mai, H. T.; Majeed, A.; Maled, V.; Maleki, S.; Malekzadeh, R.; Malta, D. C.; Mamun, A. A.; Manafi, A.; Manafi, N.; Manguerra, H.; Mansouri, B.; Mansournia, M. A.; Mantilla Herrera, A. M.; Maravilla, J. C.; Marks, A.; Martins-Melo, F. R.; Martopullo, I.; Masoumi, S. Z.; Massano, J.; Massenbourg, B. B.; Mathur, M. R.; Maulik, P. K.; McAlinden, C.; McGrath, J. J.; McKee, M.; Mehndiratta, M. M.; Mehri, F.; Mehta, K. M.; Meitei, W. B.; Memiah, P. T. N.; Mendoza, W.; Menezes, R. G.; Mengesha, E. W.; Mengesha, M. B.; Mereke, A.; Meretoja, A.; Meretoja, T. J.; Mestrovic, T.; Miazgowski, B.; Miazgowski, T.; Michalek, I. M.; Mihretie, K. M.; Miller, T. R.; Mills, E. J.; Mirica, A.; Mirrakhimov, E. M.; Mirzaei, H.; Mirzaei, M.; Mirzaei-Alavijeh, M.; Misganaw, A. T.; Mithra, P.; Moazen, B.; Moghadaszadeh, M.; Mohamadi, E.; Mohammad, D. K.; Mohammad, Y.; Mohammad Gholi Mezerji, N.; Mohammadian-Hafshejani, A.; Mohammadifard, N.; Mohammadpourhodki, R.; Mohammed, S.; Mokdad, A. H.; Molokhia, M.; Momen, N. C.; Monasta, L.; Mondello, S.; Mooney, M. D.; Moosazadeh, M.; Moradi, G.; Moradi, M.; Moradi-Lakeh, M.; Moradzadeh, R.; Moraga, P.; Morales, L.; Morawska, L.; Moreno Velásquez, I.; Morgado-da-Costa, J.; Morrison, S. D.; Mosser, J. F.; Mouodi, S.; Mousavi, S. M.; Mousavi



Khaneghah, A.; Mueller, U. O.; Munro, S. B.; Muriithi, M. K.; Musa, K. I.; Muthupandian, S.; Naderi, M.; Nagarajan, A. J.; Nagel, G.; Naghshtabrizi, B.; Nair, S.; Nandi, A. K.; Nangia, V.; Nansseu, J. R.; Nayak, V. C.; Nazari, J.; Negoï, I.; Negoï, R. I.; Netsere, H. B. N.; Ngunjiri, J. W.; Nguyen, C. T.; Nguyen, J.; Nguyen, M.; Nguyen, M.; Nichols, E.; Nigatu, D.; Nigatu, Y. T.; Nikbakhsh, R.; Nixon, M. R.; Nnaji, C. A.; Nomura, S.; Norrving, B.; Noubiap, J. J.; Nowak, C.; Nunez-Samudio, V.; Oțoiu, A.; Oancea, B.; Odell, C. M.; Ogbo, F. A.; Oh, I.-H.; Okunga, E. W.; Oladnabi, M.; Olagunju, A. T.; Olusanya, B. O.; Olusanya, J. O.; Oluwasanu, M. M.; Omar Bali, A.; Omer, M. O.; Ong, K. L.; Onwujekwe, O. E.; Orji, A. U.; Orpana, H. M.; Ortiz, A.; Ostroff, S. M.; Otstavnov, N.; Otstavnov, S. S.; Øverland, S.; Owolabi, M. O.; P A, M.; Padubidri, J. R.; Pakhare, A. P.; Palladino, R.; Pana, A.; Panda-Jonas, S.; Pandey, A.; Park, E.-K.; Parmar, P. G. K.; Pasupula, D. K.; Patel, S. K.; Paternina-Caicedo, A. J.; Pathak, A.; Pathak, M.; Patten, S. B.; Patton, G. C.; Paudel, D.; Pazoki Toroudi, H.; Peden, A. E.; Pennini, A.; Pepito, V. C. F.; Peprah, E. K.; Pereira, A.; Pereira, D. M.; Perico, N.; Pham, H. Q.; Phillips, M. R.; Pigott, D. M.; Pilgrim, T.; Pilz, T. M.; Pirsahab, M.; Plana-Ripoll, O.; Plass, D.; Pokhrel, K. N.; Polibin, R. V.; Polinder, S.; Polkinghorne, K. R.; Postma, M. J.; Pourjafar, H.; Pourmalek, F.; Pourmirza Kalhori, R.; Pourshams, A.; Poznańska, A.; Prada, S. I.; Prakash, V.; Pribadi, D. R. A.; Pupillo, E.; Quazi Syed, Z.; Rabiee, M.; Rabiee, N.; Radfar, A.; Rafiee, A.; Rafiei, A.; Raggi, A.; Rahimi-Movaghar, A.; Rahman, M. A.; Rajabpour-Sanati, A.; Rajati, F.; Ramezanzadeh, K.; Ranabhat, C. L.; Rao, P. C.; Rao, S. J.; Rasella, D.; Rastogi, P.; Rathi, P.; Rawaf, D. L.; Rawaf, S.; Rawal, L.; Razo, C.; Redford, S. B.; Reiner, R. C., Jr.; Reinig, N.; Reitsma, M. B.; Remuzzi, G.; Renjith, V.; Renzaho, A. M. N.; Resnikoff, S.; Rezaei, N.; Rezai, M. s.; Rezapour, A.; Rhinehart, P.-A.; Riahi, S. M.; Ribeiro, A. L. P.; Ribeiro, D. C.; Ribeiro, D.; Rickard, J.; Roberts, N. L. S.; Roberts, S.; Robinson, S. R.; Roever, L.; Rolfe, S.; Ronfani, L.; Roshandel, G.; Roth, G. A.; Rubagotti, E.; Rumisha, S. F.; Sabour, S.; Sachdev, P. S.; Saddik, B.; Sadeghi, E.; Sadeghi, M.; Saeidi, S.; Safi, S.; Safiri, S.; Sagar, R.; Sahebkar, A.; Sahraian, M. A.; Sajadi, S. M.; Salahshoor, M. R.; Salamati, P.; Salehi Zahabi, S.; Salem, H.; Salem, M. R. R.; Salimzadeh, H.; Salomon, J. A.; Salz, I.; Samad, Z.; Samy, A. M.; Sanabria, J.; Santomauro, D. F.; Santos, I. S.; Santos, J. V.; Santric-Milicevic, M. M.; Saraswathy, S. Y. I.; Sarmiento-Suárez, R.; Sarrafzadegan, N.; Sartorius, B.; Sarveazad, A.; Sathian, B.; Sathish, T.; Sattin, D.; Sbarra, A. N.; Schaeffer, L. E.; Schiavolin, S.; Schmidt, M. I.; Schutte, A. E.; Schwebel, D. C.; Schwendicke, F.; Senbeta, A. M.; Senthilkumaran, S.; Sepanlou, S. G.; Shackelford, K. A.; Shadid, J.; Shahabi, S.; Shaheen, A. A.; Shaikh, M. A.; Shalash, A. S.; Shams-Beyranvand, M.; Shamsizadeh, M.; Shannawaz, M.; Sharafi, K.; Sharara, F.; Sheena, B. S.; Sheikhtaheri, A.; Shetty, R. S.; Shibuya, K.; Shiferaw, W. S.; Shigematsu, M.; Shin, J. I.; Shiri, R.; Shirkoohi, R.; Shrimme, M. G.; Shuval, K.; Siabani, S.; Sigfusdottir, I. D.; Sigurvinsdottir, R.; Silva, J. P.; Simpson, K. E.; Singh, A.; Singh, J. A.; Skiadaresi, E.; Skou, S. T.; Skryabin, V. Y.; Sobngwi, E.; Sokhan, A.; Soltani, S.; Sorensen, R. J. D.; Soriano, J. B.; Sorrie, M. B.; Soyiri, I. N.; Sreeramareddy, C. T.; Stanaway, J. D.; Stark, B. A.; Ștefan, S. C.; Stein, C.; Steiner, C.; Steiner, T. J.; Stokes, M. A.; Stovner, L. J.; Stubbs, J. L.; Sudaryanto, A.; Sufiyan, M. a. B.; Sulo, G.; Sultan, I.; Sykes, B. L.; Sylte, D. O.; Szócska, M.; Tabarés-Seisdedos, R.; Tabb, K. M.; Tadakamadla, S. K.; Taherkhani, A.; Tajdini, M.; Takahashi, K.; Taveira, N.; Teagle, W. L.; Teame, H.; Tehrani-Banihashemi, A.; Teklehaimanot, B. F.; Terrason, S.; Tessema, Z. T.; Thankappan, K. R.;

- Thomson, A. M.; Tohidinik, H. R.; Tonelli, M.; Topor-Madry, R.; Torre, A. E.; Touvier, M.; Tovani-Palone, M. R. R.; Tran, B. X.; Travillian, R.; Troeger, C. E.; Truelsen, T. C.; Tsai, A. C.; Tsatsakis, A.; Tudor Car, L.; Tyrovolas, S.; Uddin, R.; Ullah, S.; Undurraga, E. A.; Unnikrishnan, B.; Vacante, M.; Vakilian, A.; Valdez, P. R.; Varughese, S.; Vasankari, T. J.; Vasseghian, Y.; Venketasubramanian, N.; Violante, F. S.; Vlassov, V.; Vollset, S. E.; Vongpradith, A.; Vukovic, A.; Vukovic, R.; Waheed, Y.; Walters, M. K.; Wang, J.; Wang, Y.; Wang, Y.-P.; Ward, J. L.; Watson, A.; Wei, J.; Weintraub, R. G.; Weiss, D. J.; Weiss, J.; Westerman, R.; Whisnant, J. L.; Whiteford, H. A.; Wiangkham, T.; Wiens, K. E.; Wijeratne, T.; Wilner, L. B.; Wilson, S.; Wojtyniak, B.; Wolfe, C. D. A.; Wool, E. E.; Wu, A.-M.; Wulf Hanson, S.; Wunrow, H. Y.; Xu, G.; Xu, R.; Yadgir, S.; Yahyazadeh Jabbari, S. H.; Yamagishi, K.; Yaminfirooz, M.; Yano, Y.; Yaya, S.; Yazdi-Feyzabadi, V.; Yearwood, J. A.; Yeheyis, T. Y.; Yeshitila, Y. G.; Yip, P.; Yonemoto, N.; Yoon, S.-J.; Yoosefi Lebni, J.; Younis, M. Z.; Younker, T. P.; Yousefi, Z.; Yousefifard, M.; Yousefinezhadi, T.; Yousuf, A. Y.; Yu, C.; Yusefzadeh, H.; Zahirian Moghadam, T.; Zaki, L.; Zaman, S. B.; Zamani, M.; Zamanian, M.; Zandian, H.; Zangeneh, A.; Zastrozhin, M. S.; Zewdie, K. A.; Zhang, Y.; Zhang, Z.-J.; Zhao, J. T.; Zhao, Y.; Zheng, P.; Zhou, M.; Ziapour, A.; Zimsen, S. R. M.; Naghavi, M.; Murray, C. J. L., Global burden of 369 diseases and injuries in 204 countries and territories, 1990&#x2013;2019: a systematic analysis for the Global Burden of Disease Study 2019. *The Lancet* **2020**, *396* (10258), 1204-1222.
15. Juanita, A. H.; Nicholas, G.; Ian, B.; Mohsen, N.; Hideki, H.; Erin, C. M.; Semaw Ferede, A.; Jerry Puthenpurakal, A.; Koranteng, A.; Ubai, A.; Emmanuel, A. A.; Walid, A.; Carl Abelardo, T. A.; Lope, H. B.; Tolesa, B.; Dipan, B.; Alexandra, B.; Ferrán, C.-L.; Lalit, D.; Rakhi, D.; Paul, I. D.; Diego De, L.; Louisa, D.; Sarah, D.; Samath, D. D.; Tim, R. D.; Leilei, D.; Sergey Petrovich, E.; Farshad, F.; Valery, L. F.; Richard, C. F.; Belinda, G.; Richard, A. G.; Nima, H.-N.; Randah Ribhi, H.; Martha, H.; Guoqing, H.; Sudha, P. J.; Guohong, J.; Yousef Saleh, K.; Ejaz Ahmad, K.; Sanjay, K.; Chanda, K.; Fiona, E. L.; Ricky, L.; Raimundas, L.; Ronan Anthony, L.; Marek, M.; Amanda, J. M.-J.; Richard, M.; Peter, A. M.; Wubegzier, M.; Ted, R. M.; Charles, N. M.; Rosana, E. N.; Ricardo, O.; Suzanne, P.; Farshad, P.; Vafa, R.-M.; Amany, R.; David, R.-R.; Nobhojit, R.; David, C. S.; Amira, S.; Saeid, S.; Vegard, S.; Kjetil, S.; Sergey, S.; Dan, J. S.; Bryan, L. S.; Karen, M. T.; Awoke Misganaw, T.; Eric Yeboah, T.; Alice, M. T.; Bach Xuan, T.; Tommi, J. V.; Monica, S. V.; Vasiliy Victorovich, V.; Solomon Meseret, W.; Paul, Y.; Naohiro, Y.; Mustafa, Z. Y.; Chuanhua, Y.; Christopher, J. L. M.; Theo, V.; Shivanthi, B.; Michael, R. P., The global burden of injury: incidence, mortality, disability-adjusted life years and time trends from the Global Burden of Disease study 2013. *Injury Prevention* **2016**, *22* (1), 3.
16. Greer, S. L., How Does Decentralisation Affect the Welfare State? Territorial Politics and the Welfare State in the UK and US. *Journal of Social Policy* **2010**, *39* (2), 181-201.
17. *OSH Statistics in Japan*. <https://www.jisha.or.jp/english/statistics/index.html> (accessed 2023-03-21).
18. *Work-related injuries*. <https://www.safeworkaustralia.gov.au/data-and-research/work-related-injuries> (accessed 2023-03-21).
19. *Accidents at work statistics*. [https://ec.europa.eu/eurostat/statistics-explained/index.php?title=Accidents\\_at\\_work\\_statistics#:~:text=Standardised%20incidence%20rates%20only%20cover,employed%20\(see%20Figure%204\)](https://ec.europa.eu/eurostat/statistics-explained/index.php?title=Accidents_at_work_statistics#:~:text=Standardised%20incidence%20rates%20only%20cover,employed%20(see%20Figure%204)). (accessed 2023-03-21).

20. *Reports and publications: Occupational health and safety.*  
<https://www.canada.ca/en/employment-social-development/services/health-safety/reports.html> (accessed 2023-03-21).
21. *Occupational Injuries and Illnesses Statistics - as of February 2012.*  
[https://kosha.or.kr/english/news/whatsNew.do?mode=view&articleNo=55074&article\\_offset=0&articleLimit=10&srSearchVal=injuries&srSearchKey=article\\_title](https://kosha.or.kr/english/news/whatsNew.do?mode=view&articleNo=55074&article_offset=0&articleLimit=10&srSearchVal=injuries&srSearchKey=article_title).
